# Supplementary material for: Zinc(II) Terpyridine Complexes: Substituent Effect on Photoluminescence, Antiproliferative Activity, and DNA Interaction
Source: MDPI journal article supplement (doi:10.3390/molecules24244519), 2019-12-10
Supplement: s1 [file s1]

**Zinc(II) terpyridine complexes: substituent effect on  
photoluminescence, antiproliferative activity and DNA interaction**

Jiahe Li <sup>1,2</sup>, Rongping Liu <sup>1</sup>, Jinzhang Jiang <sup>1</sup>, Xing Liang <sup>1</sup>, Ling Huang <sup>1</sup>,  
Gang Huang <sup>3</sup>, Hailan Chen <sup>4,\*</sup>, Lixia Pan <sup>2,\*</sup> and Zhen Ma <sup>1,2,\*</sup>

<sup>1</sup> School of Chemistry and Chemical Engineering, Guangxi University, Nanning 530004, Guangxi, People's Republic of China; lijiahe006@163.com(J.L.); 1152543513@qq.com(R.L.); jjz19941028@gmail.com(J.J.); liangxing587@126.com(X.L.); 441073854@qq.com(L.H.); mzmz2009@sohu.com(Z.M)

<sup>2</sup> Centro de Química Estrutural, Instituto Superior Técnico, Universidade de Lisboa, Av. Rovisco Pais, 1049-001, Lisbon, Portugal

<sup>3</sup> National Engineering Research Center for Non-Food Biorefinery, State Key Laboratory of Non-Food Biomass and Enzyme Technology, Guangxi Key Laboratory of Bio-refinery, Guangxi Biomass Engineering Technology Research Center, Guangxi Academy of Sciences, Nanning 530004, Guangxi, People's Republic of China; wangyi.07@163.com; panlixia@gxas.cn

<sup>4</sup> School of Animal Science and Technology, Guangxi University, Nanning 530004, Guangxi, People's Republic of China; hlchen319@163.com

\* Correspondence: hlchen319@163.com(H.C.); panlixia@gxas.cn(L.P.); mzmz2009@sohu.com(Z.M.)

## INDEX

|                                                                                             |     |
|---------------------------------------------------------------------------------------------|-----|
| <b>Figure S1</b> <sup>1</sup> H NMR spectrum of compound <b>2</b> in DMSO (600 MHz). .....  | S6  |
| <b>Figure S2</b> <sup>1</sup> H NMR spectrum of compound <b>3</b> in DMSO (600 MHz). .....  | S6  |
| <b>Figure S3</b> <sup>1</sup> H NMR spectrum of compound <b>4</b> in DMSO (600 MHz). .....  | S7  |
| <b>Figure S4</b> <sup>1</sup> H NMR spectrum of compound <b>5</b> in DMSO (600 MHz). .....  | S7  |
| <b>Figure S5</b> <sup>1</sup> H NMR spectrum of compound <b>9</b> in DMSO (600 MHz). .....  | S8  |
| <b>Figure S6</b> <sup>1</sup> H NMR spectrum of compound <b>10</b> in DMSO (600 MHz). ..... | S8  |
| <b>Figure S7</b> The ESI–MS spectrum of compound <b>2</b> . .....                           | S9  |
| <b>Figure S8</b> The ESI–MS spectrum of compound <b>3</b> . .....                           | S9  |
| <b>Figure S9</b> The ESI–MS spectrum of compound <b>4</b> . .....                           | S9  |
| <b>Figure S10</b> The ESI–MS spectrum of compound <b>5</b> . .....                          | S10 |
| <b>Figure S11</b> The ESI–MS spectrum of compound <b>9</b> . .....                          | S10 |
| <b>Figure S12</b> The ESI–MS spectrum of compound <b>10</b> . .....                         | S10 |
| <b>Figure S13</b> The IR spectrum of compound <b>2</b> . .....                              | S11 |
| <b>Figure S14</b> The IR spectrum of compound <b>3</b> . .....                              | S11 |
| <b>Figure S15</b> The IR spectrum of compound <b>4</b> . .....                              | S11 |
| <b>Figure S16</b> The IR spectrum of compound <b>5</b> . .....                              | S12 |
| <b>Figure S17</b> The IR spectrum of compound <b>9</b> . .....                              | S12 |
| <b>Figure S18</b> The IR spectrum of compound <b>10</b> . .....                             | S12 |
| <b>Figure S19</b> UV–vis spectra of compounds <b>1</b> for a period of 72 h. ....           | S13 |
| <b>Figure S20</b> UV–vis spectra of compounds <b>2</b> for a period of 72 h. ....           | S13 |
| <b>Figure S21</b> UV–vis spectra of compounds <b>3</b> for a period of 72 h. ....           | S13 |
| <b>Figure S22</b> UV–vis spectra of compounds <b>4</b> for a period of 72 h. ....           | S14 |
| <b>Figure S23</b> UV–vis spectra of compounds <b>5</b> for a period of 72 h. ....           | S14 |
| <b>Figure S24</b> UV–vis spectra of compounds <b>6</b> for a period of 72 h. ....           | S14 |
| <b>Figure S25</b> UV–vis spectra of compounds <b>7</b> for a period of 72 h. ....           | S15 |
| <b>Figure S26</b> UV–vis spectra of compounds <b>8</b> for a period of 72 h. ....           | S15 |
| <b>Figure S27</b> UV–vis spectra of compounds <b>9</b> for a period of 72 h. ....           | S15 |
| <b>Figure S28</b> UV–vis spectra of compounds <b>10</b> for a period of 72 h. ....          | S16 |

|                                                                                                                                                                                                                                     |     |
|-------------------------------------------------------------------------------------------------------------------------------------------------------------------------------------------------------------------------------------|-----|
| <b>Figure S29</b> The microscopic photographs of the A549 cancer cell treated with increased concentrations of the compounds <b>1–9</b> and cisplatin at magnification of 200×.....                                                 | S18 |
| <b>Figure S30</b> The microscopic photographs of the MCF-7 cancer cell treated with increased concentrations of the compounds <b>1–9</b> and cisplatin at magnification of 200×. ....                                               | S20 |
| <b>Figure S31</b> The microscopic photographs of the Eca-109 cancer cell treated with increased concentrations of the compounds <b>1–9</b> and cisplatin at magnification of 200×. ....                                             | S22 |
| <b>Figure S32</b> The plots of the cell viability vs. the concentration of compounds <b>1–10</b> against Bel-7402 cell line.....                                                                                                    | S23 |
| <b>Figure S33</b> The plots of the cell viability vs. the concentration of compounds <b>1–10</b> against MCF-7 cell line.....                                                                                                       | S23 |
| <b>Figure S34</b> The plots of the cell viability vs. the concentration of compounds <b>1–10</b> against Eca-109 cell line. ....                                                                                                    | S24 |
| <b>Figure S35</b> The plots of the cell viability vs. the concentration of compounds <b>1–10</b> against RAW 264.7 cell line. ....                                                                                                  | S24 |
| <b>Figure S36</b> UV–vis spectra for compounds <b>1–10</b> in Tris-HCl $1.0 \times 10^{-3}$ (pH 7.2) with increasing the concentration of CT-DNA, and the inset show plots of $A_0/(A-A_0)$ versus the concentration of CT-DNA..... | S26 |
| <b>Figure S37</b> Circular dichroism spectra of three kinds of DNA in the presence or absence of compounds <b>2–5</b> in Tris-HCl buffer (pH 7.2), at 20 °C. ....                                                                   | S27 |
| <b>Figure S38</b> Circular dichroism spectra of three kinds of DNA in the presence or absence of compounds <b>7–10</b> in Tris-HCl buffer (pH 7.2), at 20 °C. ....                                                                  | S28 |
| <b>Figure S39</b> The most favorable orientation of (A): compound <b>1</b> , (B): compound <b>2</b> and (C): compound <b>4</b> bound with the minor groove of the CT-DNA (PDB ID: 1BNA). ....                                       | S31 |
| <b>Figure S40</b> The most favorable orientation of compound <b>3</b> bound with the minor groove of the B-DNA (PDB ID: 1BNA).....                                                                                                  | S31 |
| <b>Figure S41</b> The most favorable orientation of compound <b>6</b> bound with the minor groove of the B-DNA (PDB ID: 1BNA).....                                                                                                  | S31 |

|                                                                                                                                                                                                                                   |     |
|-----------------------------------------------------------------------------------------------------------------------------------------------------------------------------------------------------------------------------------|-----|
| <b>Figure S42</b> The most favorable orientation of compound <b>7</b> bound with the minor groove of the B-DNA (PDB ID: 1BNA).....                                                                                                | S32 |
| <b>Figure S43</b> The most favorable orientation of compound <b>8</b> bound with the minor groove of the B-DNA (PDB ID: 1BNA).....                                                                                                | S32 |
| <b>Figure S44</b> The most favorable orientation of compound <b>9</b> bound with the minor groove of the B-DNA (PDB ID: 1BNA).....                                                                                                | S32 |
| <b>Figure S45</b> The most favorable orientation of compound <b>10</b> bound with the minor groove of the B-DNA (PDB ID: 1BNA).....                                                                                               | S33 |
| <b>Figure S46</b> View of the energy minimized docked poses of compound <b>1</b> with (A) ds(ATGCAT) <sub>2</sub> (PDB ID: 4JD8), (B) ds(ATAT) <sub>2</sub> (PDB ID: 2DA8M), and (C) ds(CGCGCG) <sub>2</sub> (PDB ID: 2ROUM)..... | S34 |
| <b>Figure S47</b> View of the energy minimized docked poses of compound <b>2</b> with (A) ds(ATGCAT) <sub>2</sub> (PDB ID: 4JD8), (B) ds(ATAT) <sub>2</sub> (PDB ID: 2DA8M), and (C) ds(CGCGCG) <sub>2</sub> (PDB ID: 2ROUM)..... | S35 |
| <b>Figure S48</b> View of the energy minimized docked poses of compound <b>3</b> with (A) ds(ATGCAT) <sub>2</sub> (PDB ID: 4JD8), (B) ds(ATAT) <sub>2</sub> (PDB ID: 2DA8M), and (C) ds(CGCGCG) <sub>2</sub> (PDB ID: 2ROUM)..... | S36 |
| <b>Figure S49</b> View of the energy minimized docked poses of compound <b>4</b> with (A) ds(ATGCAT) <sub>2</sub> (PDB ID: 4JD8), (B) ds(ATAT) <sub>2</sub> (PDB ID: 2DA8M), and (C) ds(CGCGCG) <sub>2</sub> (PDB ID: 2ROUM)..... | S37 |
| <b>Figure S50</b> View of the energy minimized docked poses of compound <b>5</b> with (A) ds(ATGCAT) <sub>2</sub> (PDB ID: 4JD8), (B) ds(ATAT) <sub>2</sub> (PDB ID: 2DA8M), and (C) ds(CGCGCG) <sub>2</sub> (PDB ID: 2ROUM)..... | S38 |
| <b>Figure S51</b> View of the energy minimized docked poses of compound <b>6</b> with (A) ds(ATGCAT) <sub>2</sub> (PDB ID: 4JD8), (B) ds(ATAT) <sub>2</sub> (PDB ID: 2DA8M), and (C) ds(CGCGCG) <sub>2</sub> (PDB ID: 2ROUM)..... | S39 |
| <b>Figure S52</b> View of the energy minimized docked poses of compound <b>7</b> with (A) ds(ATGCAT) <sub>2</sub> (PDB ID: 4JD8), (B) ds(ATAT) <sub>2</sub> (PDB ID: 2DA8M), and (C) ds(CGCGCG) <sub>2</sub> (PDB ID: 2ROUM)..... | S40 |
| <b>Figure S53</b> View of the energy minimized docked poses of compound <b>8</b> with (A)                                                                                                                                         |     |



ds(ATGCAT)<sub>2</sub> (PDB ID: 4JD8), (B) ds(ATAT)<sub>2</sub> (PDB ID: 2DA8M), and (C) ds(CGCGCG)<sub>2</sub> (PDB ID: 2ROUM).....S41

**Figure S54** View of the energy minimized docked poses of compound **9** with (A) ds(ATGCAT)<sub>2</sub> (PDB ID: 4JD8), (B) ds(ATAT)<sub>2</sub> (PDB ID: 2DA8M), and (C) ds(CGCGCG)<sub>2</sub> (PDB ID: 2ROUM).....S42

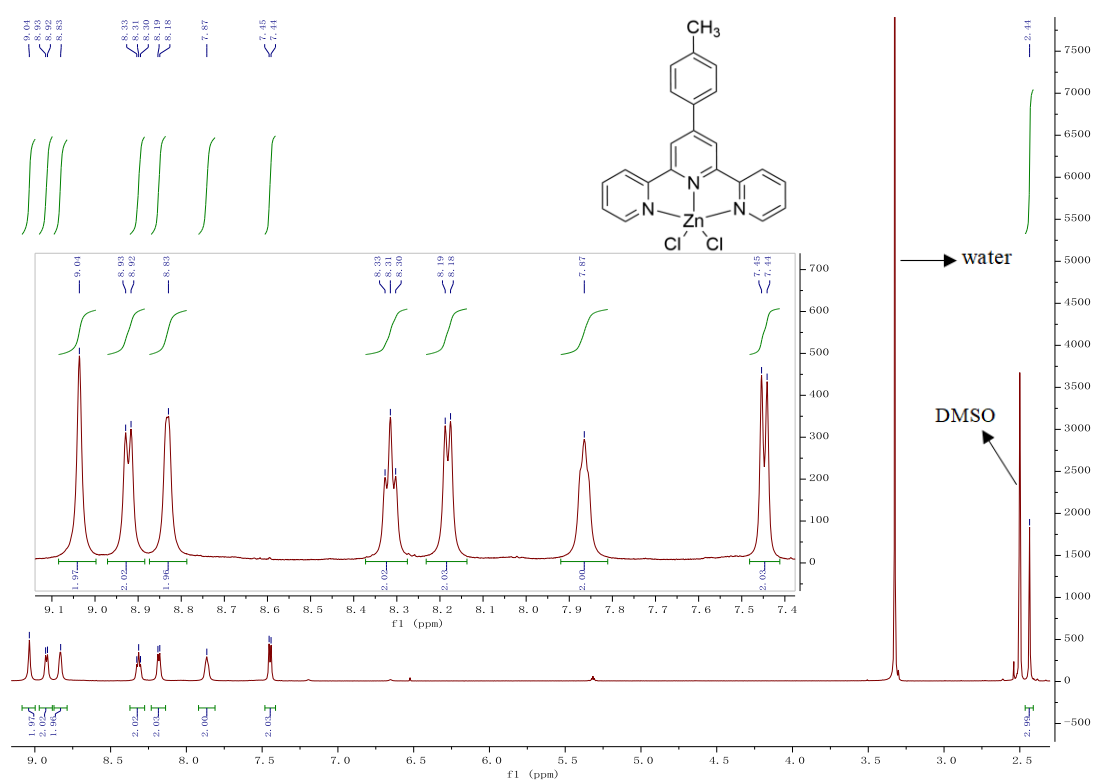

**Figure S1**  $^1\text{H}$  NMR spectrum of compound **2** in DMSO (600 MHz).

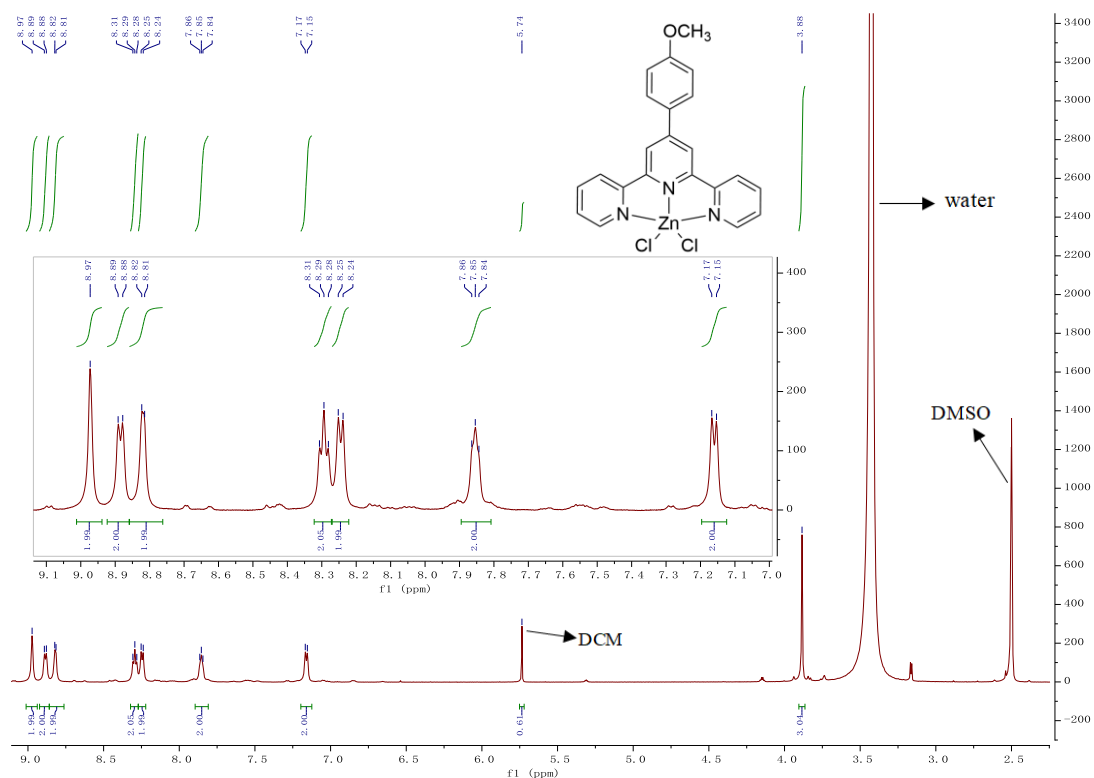

**Figure S2**  $^1\text{H}$  NMR spectrum of compound **3** in DMSO (600 MHz).

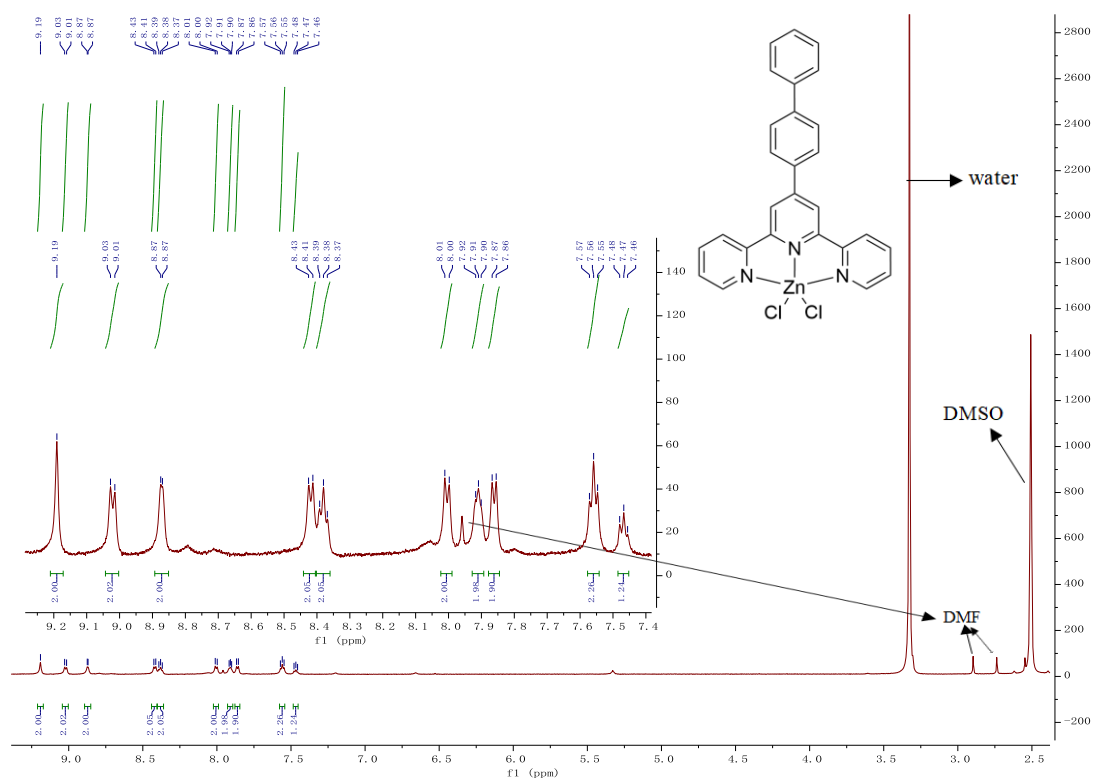

**Figure S3**  $^1\text{H}$  NMR spectrum of compound **4** in DMSO (600 MHz).

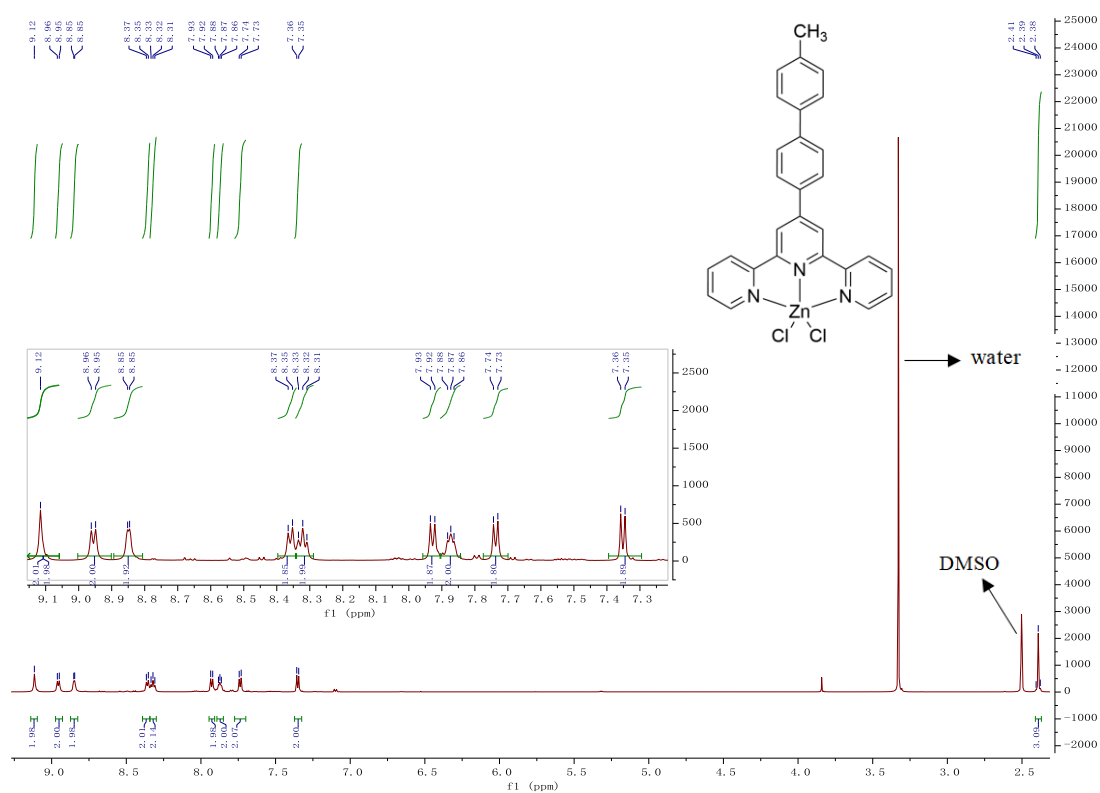

**Figure S4**  $^1\text{H}$  NMR spectrum of compound **5** in DMSO (600 MHz).



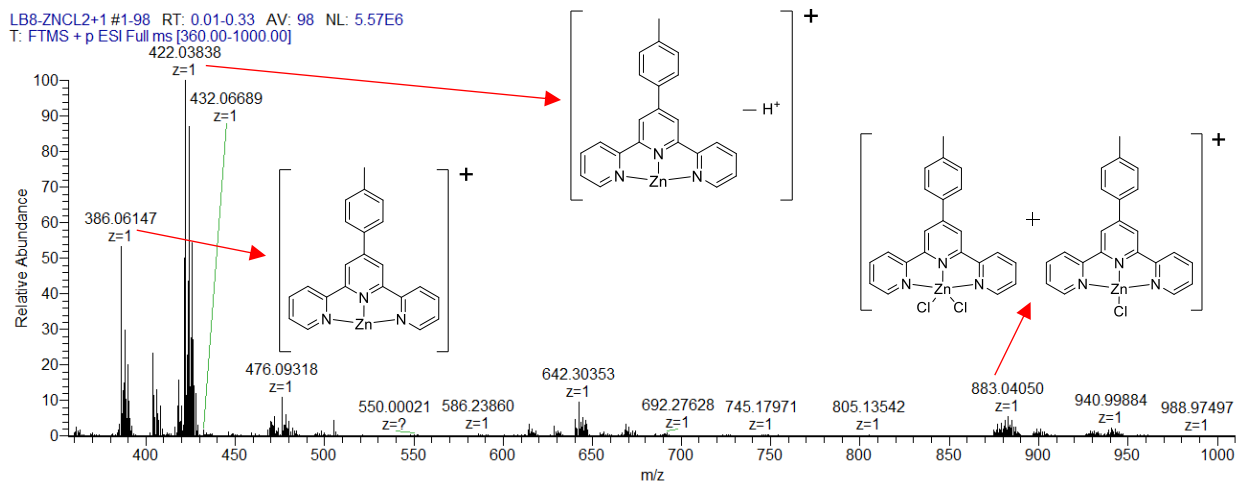

Figure S7 The ESI-MS spectrum of compound 2.

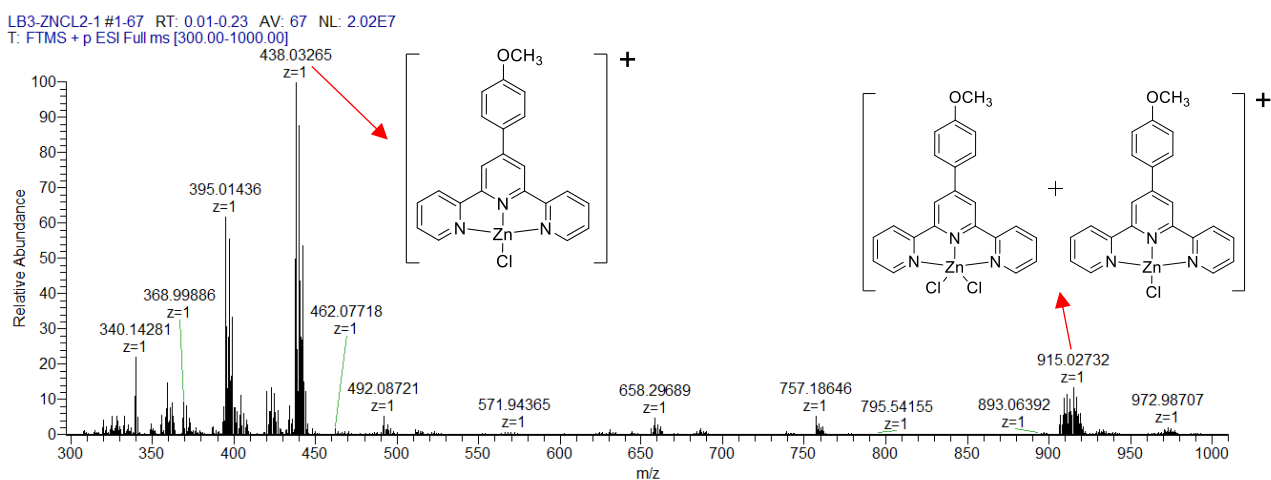

Figure S8 The ESI-MS spectrum of compound 3.

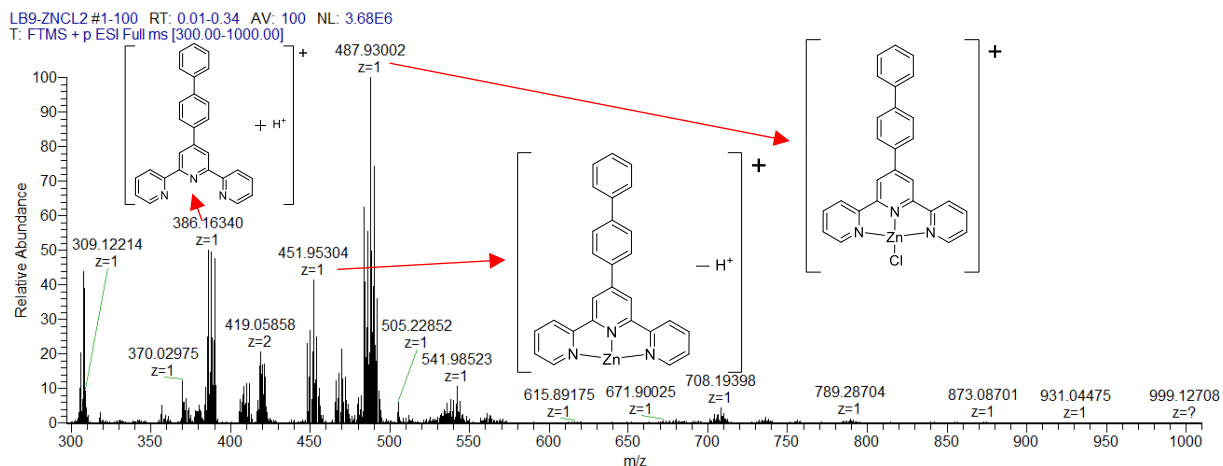

Figure S9 The ESI-MS spectrum of compound 4.

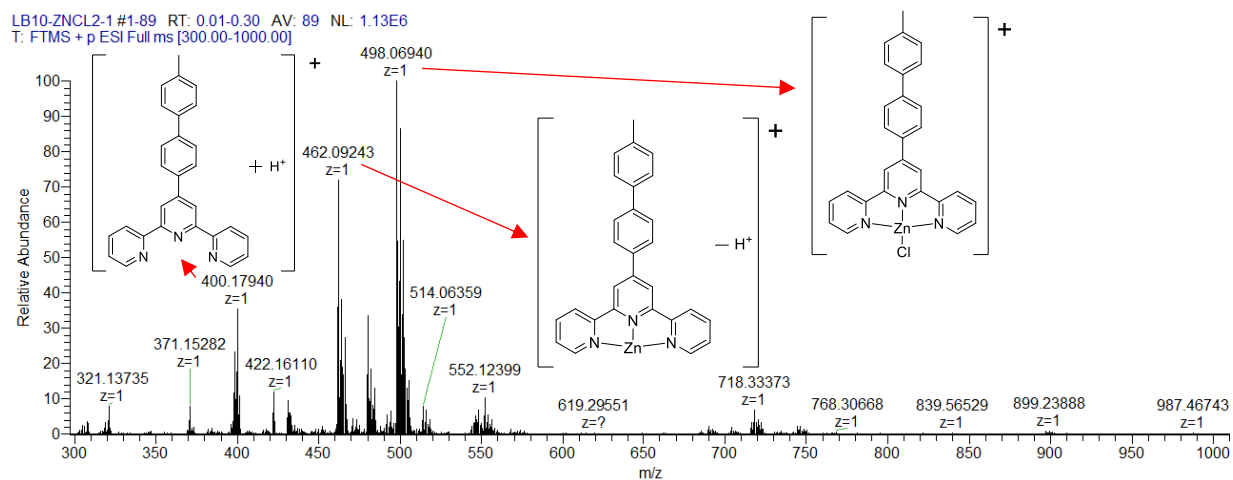

Figure S10 The ESI-MS spectrum of compound 5.

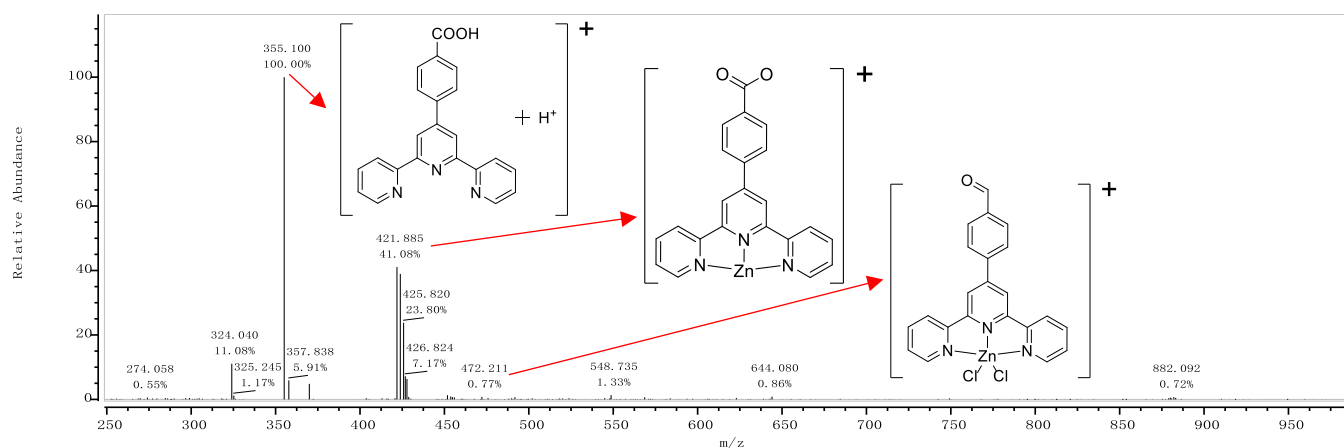

Figure S11 The ESI-MS spectrum of compound 9.

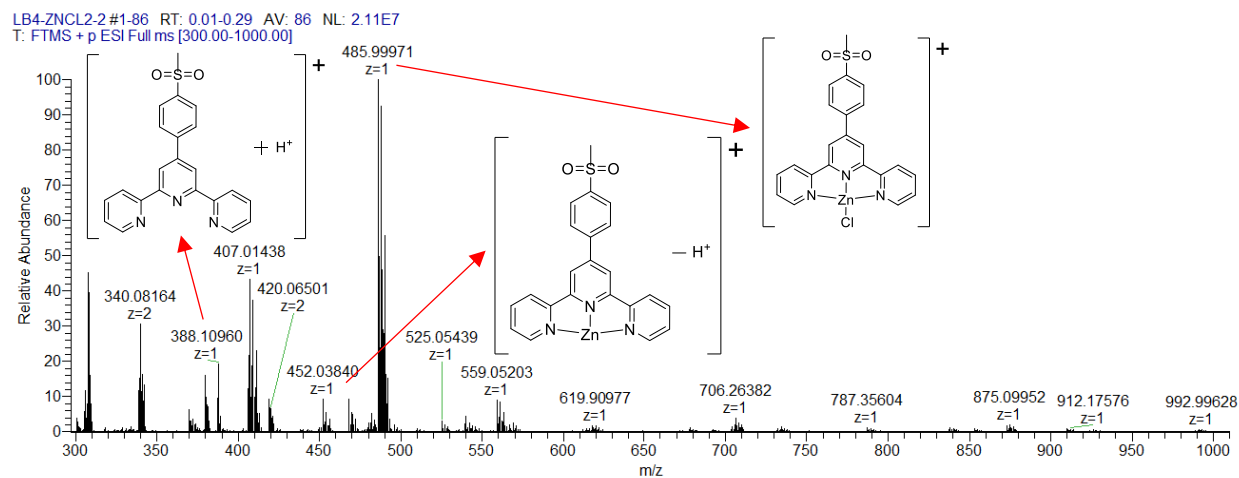

Figure S12 The ESI-MS spectrum of compound 10.

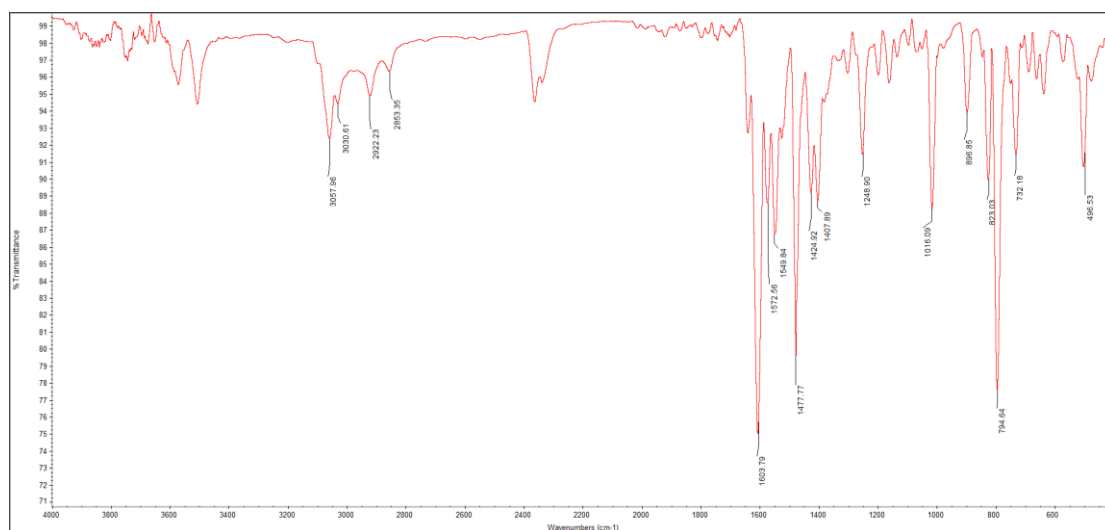

**Figure S13** The IR spectrum of compound **2**.

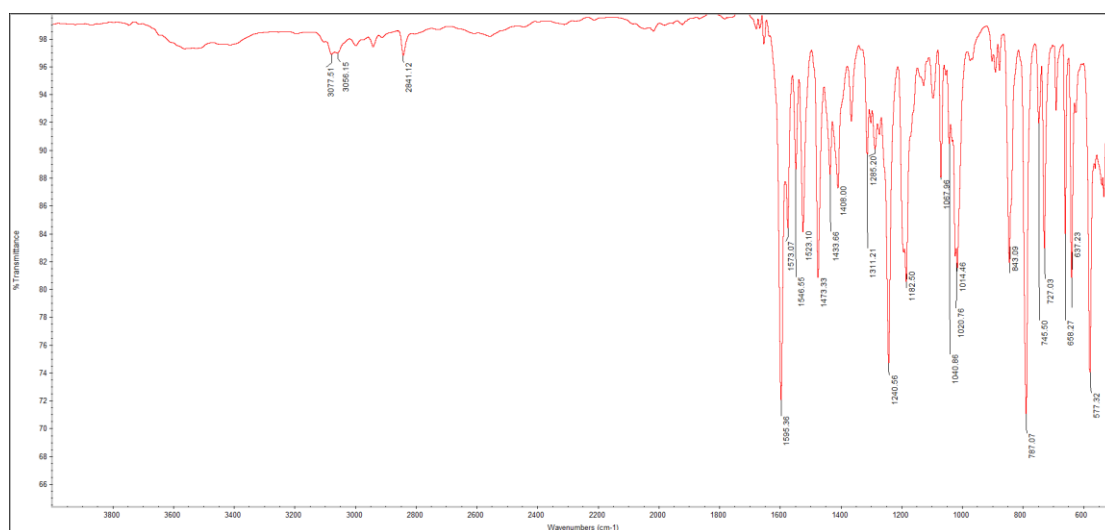

**Figure S14** The IR spectrum of compound **3**.

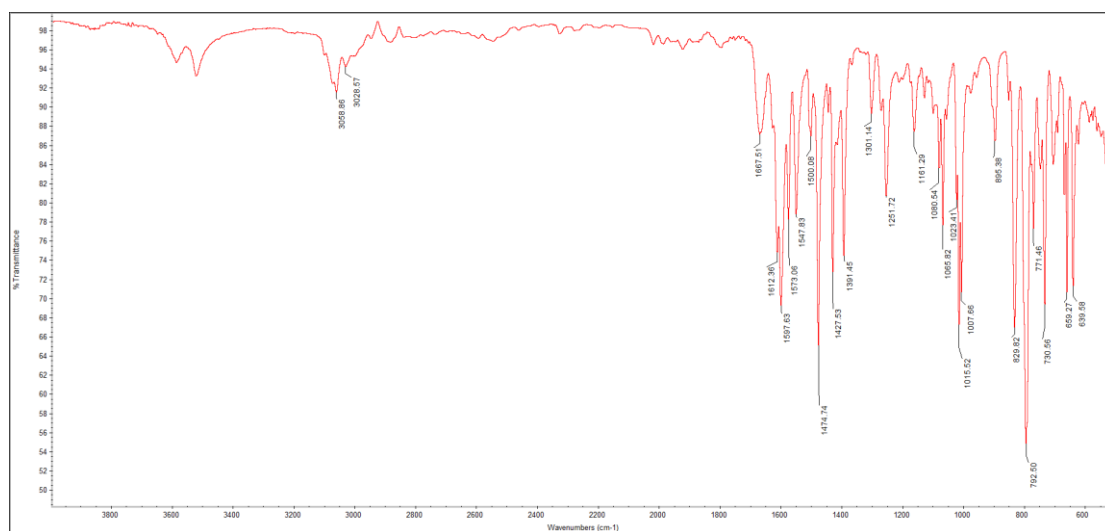

**Figure S15** The IR spectrum of compound **4**.

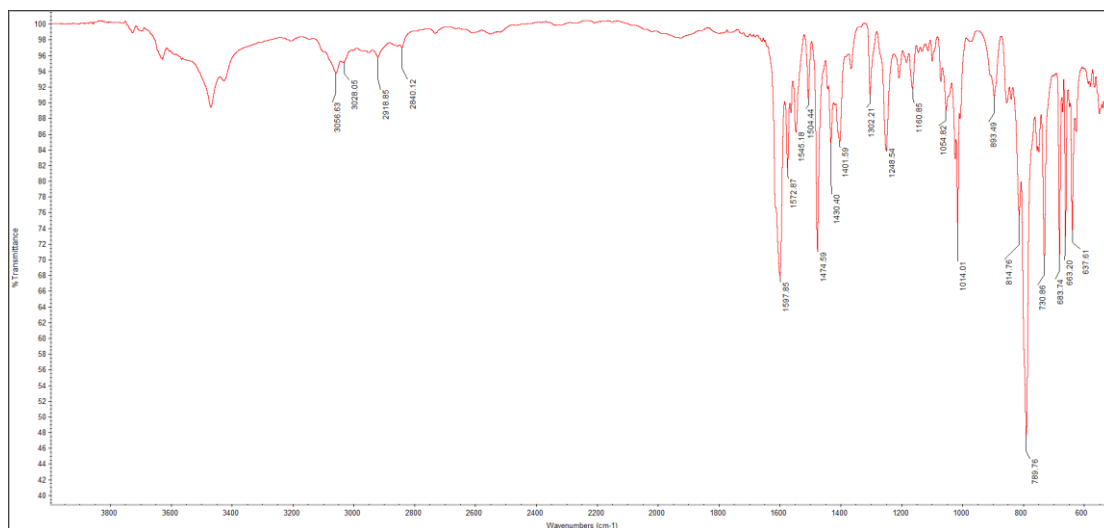

**Figure S16** The IR spectrum of compound **5**.

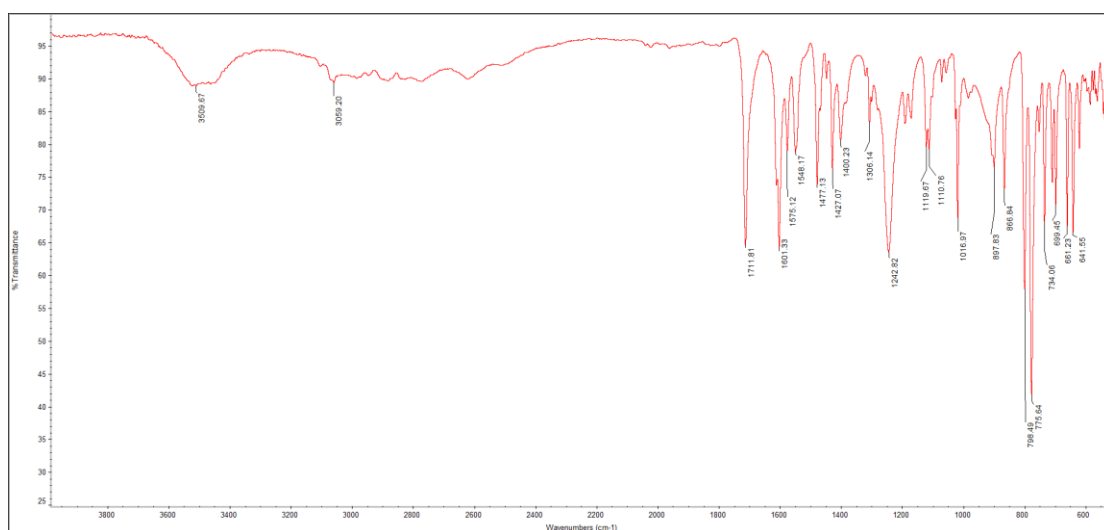

**Figure S17** The IR spectrum of compound **9**.

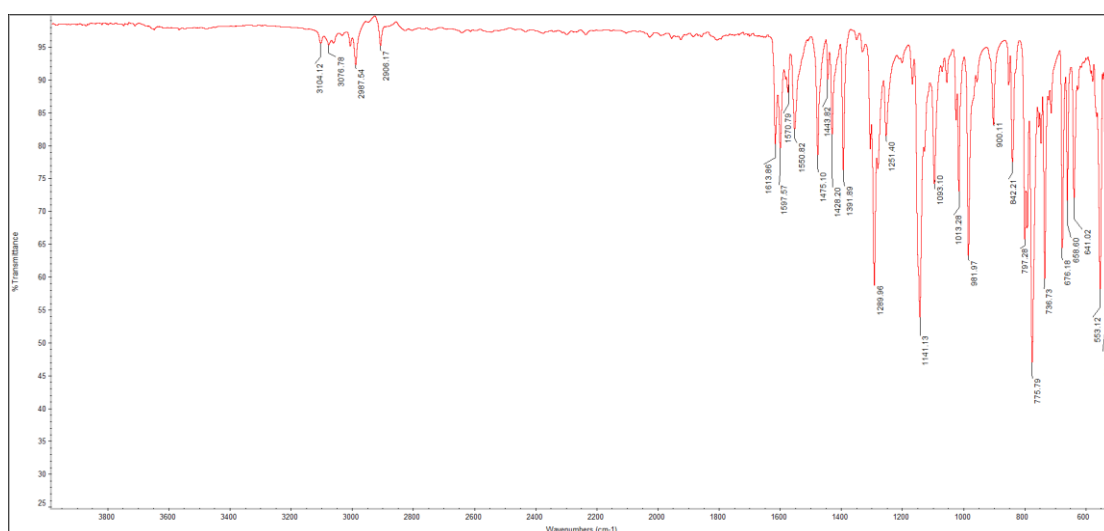

**Figure S18** The IR spectrum of compound **10**.



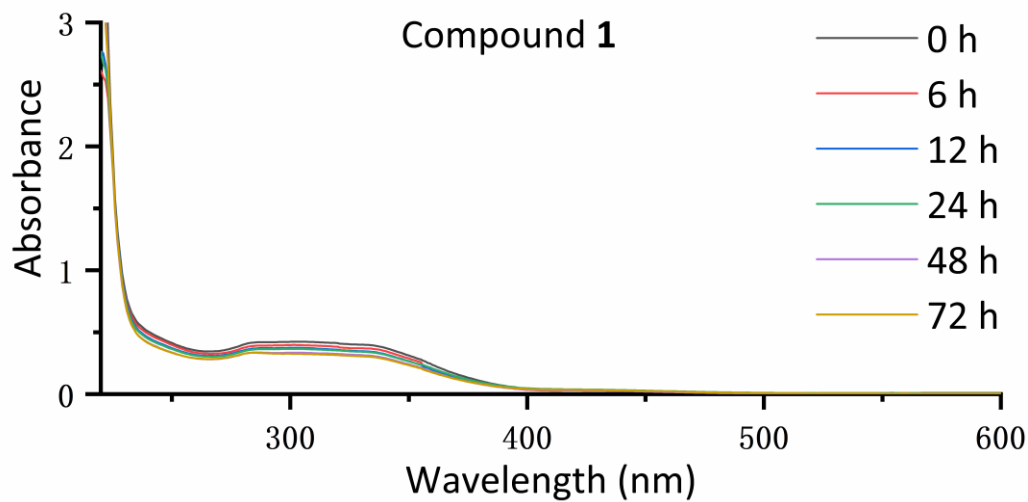

Figure S19 UV-vis spectra of compounds **1** for a period of 72 h.

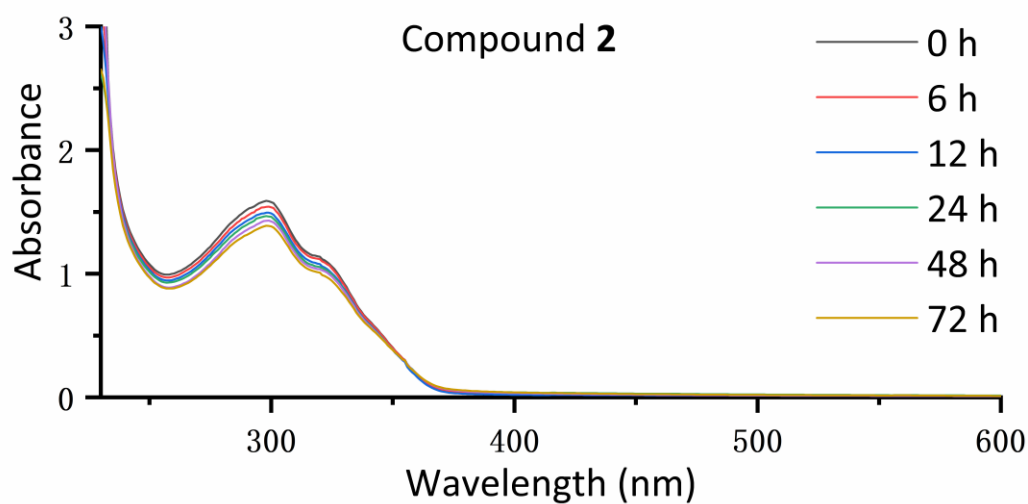

Figure S20 UV-vis spectra of compounds **2** for a period of 72 h.

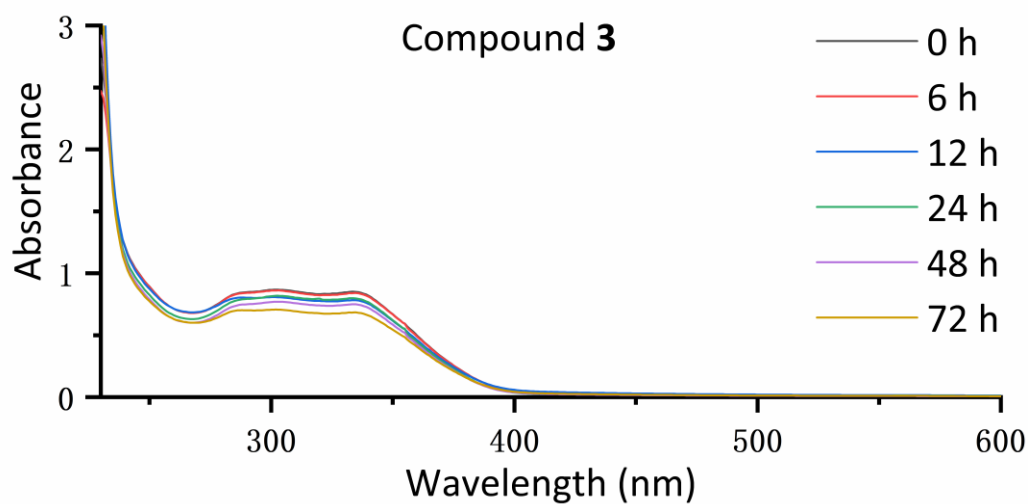

Figure S21 UV-vis spectra of compounds **3** for a period of 72 h.

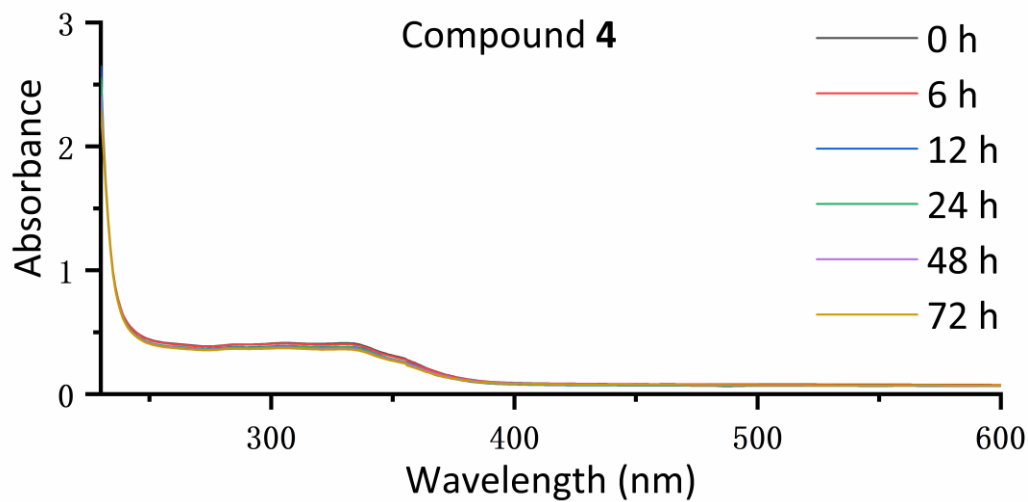

Figure S22 UV-vis spectra of compounds 4 for a period of 72 h.

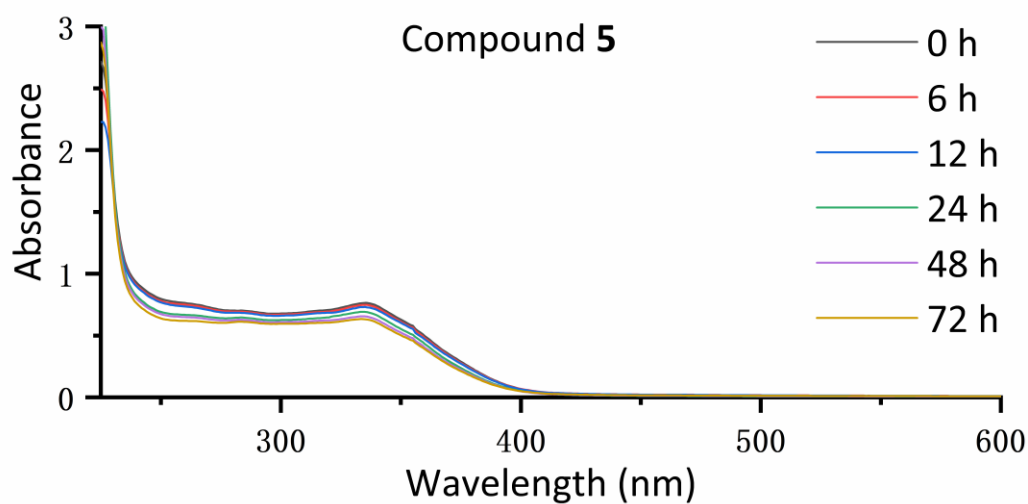

Figure S23 UV-vis spectra of compounds 5 for a period of 72 h.

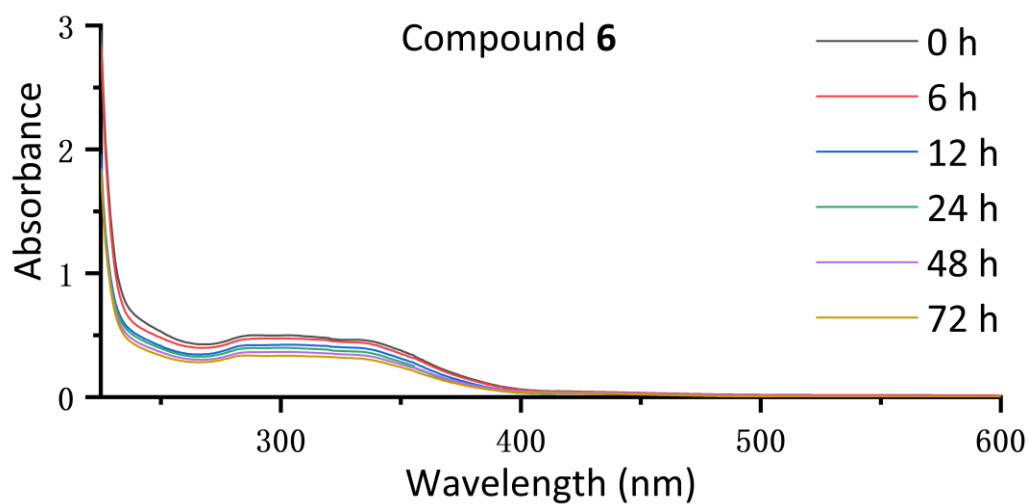

Figure S24 UV-vis spectra of compounds 6 for a period of 72 h.

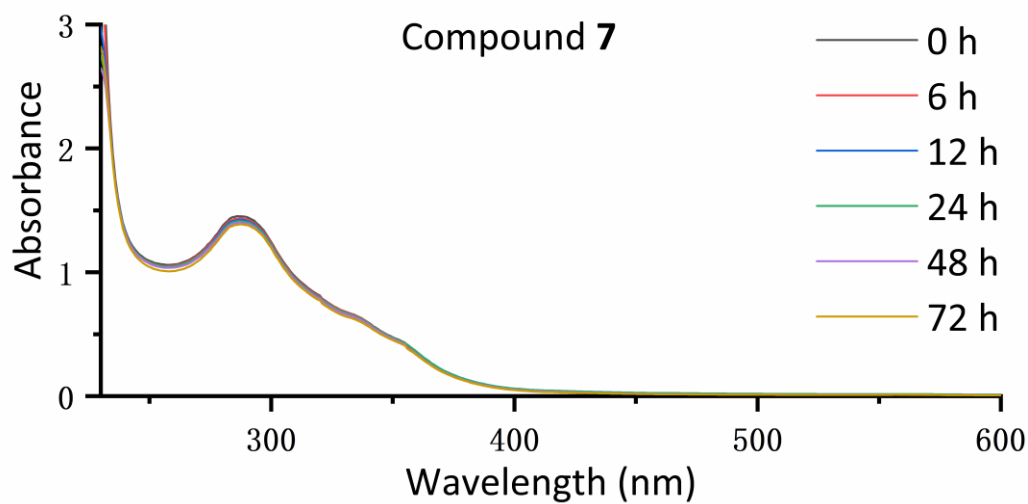

Figure S25 UV-vis spectra of compounds 7 for a period of 72 h.

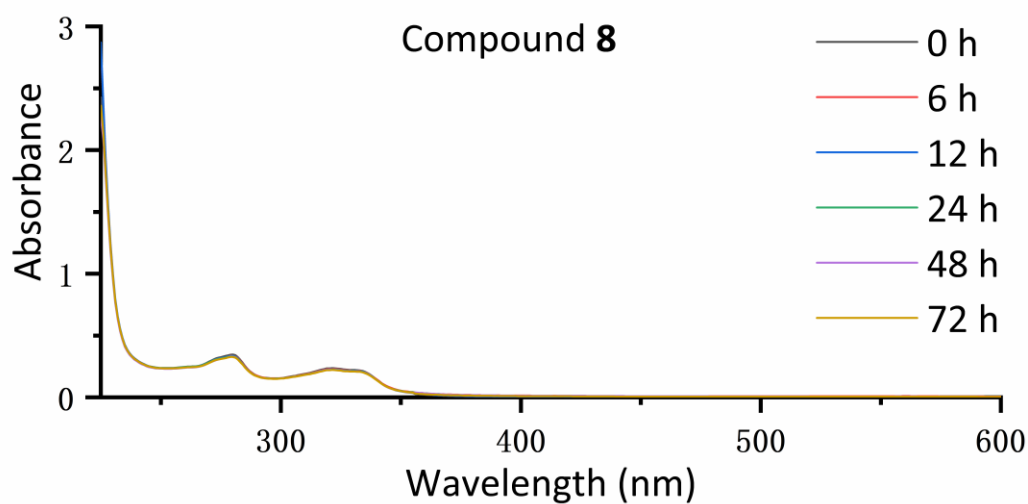

Figure S26 UV-vis spectra of compounds 8 for a period of 72 h.

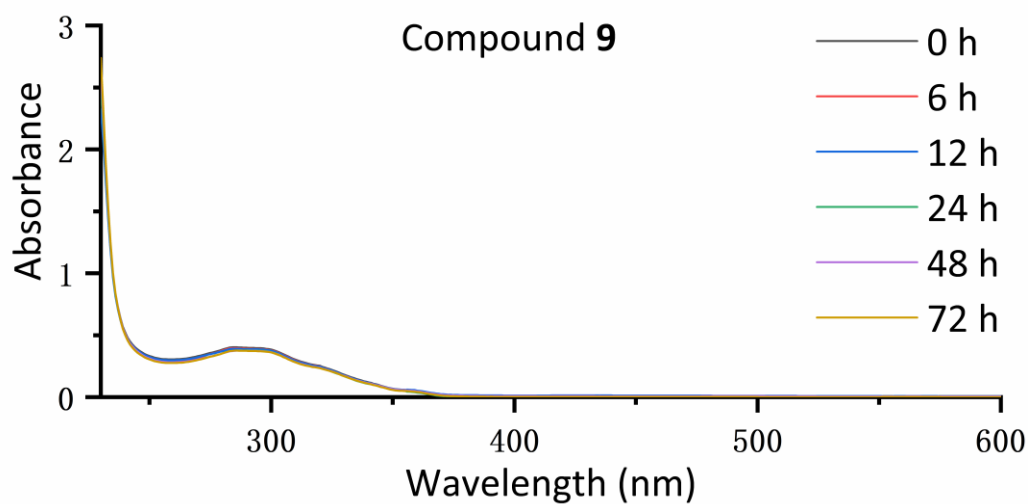

Figure S27 UV-vis spectra of compounds 9 for a period of 72 h.

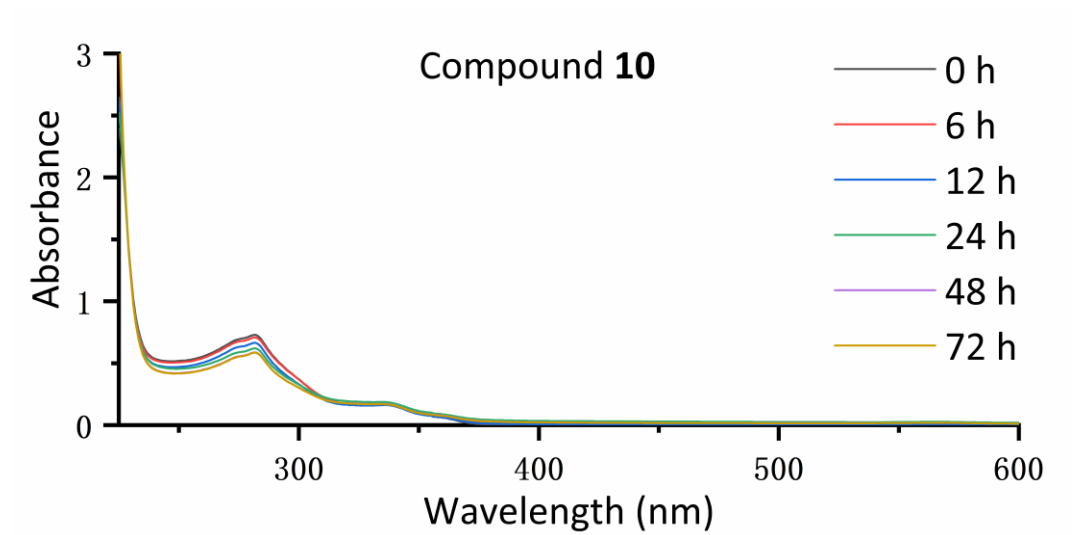

**Figure S28** UV-vis spectra of compounds **10** for a period of 72 h.

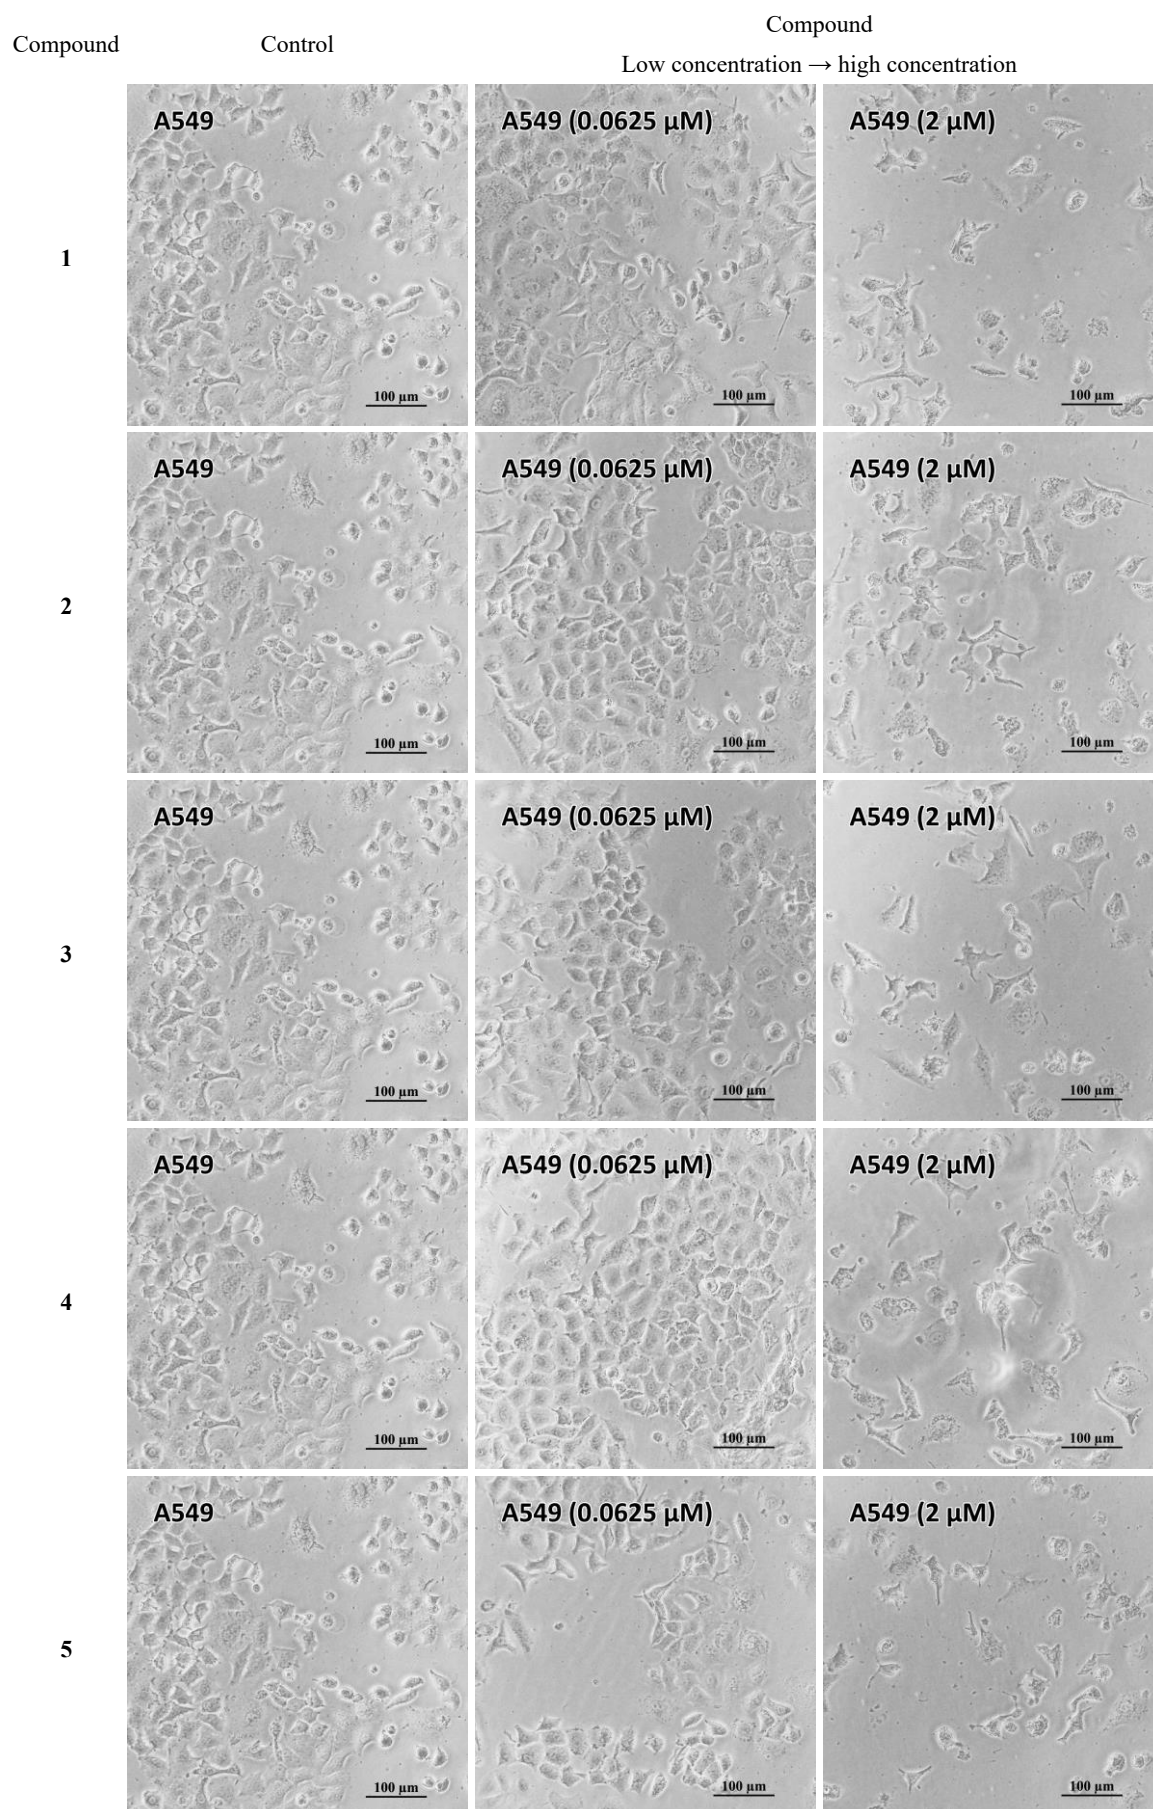

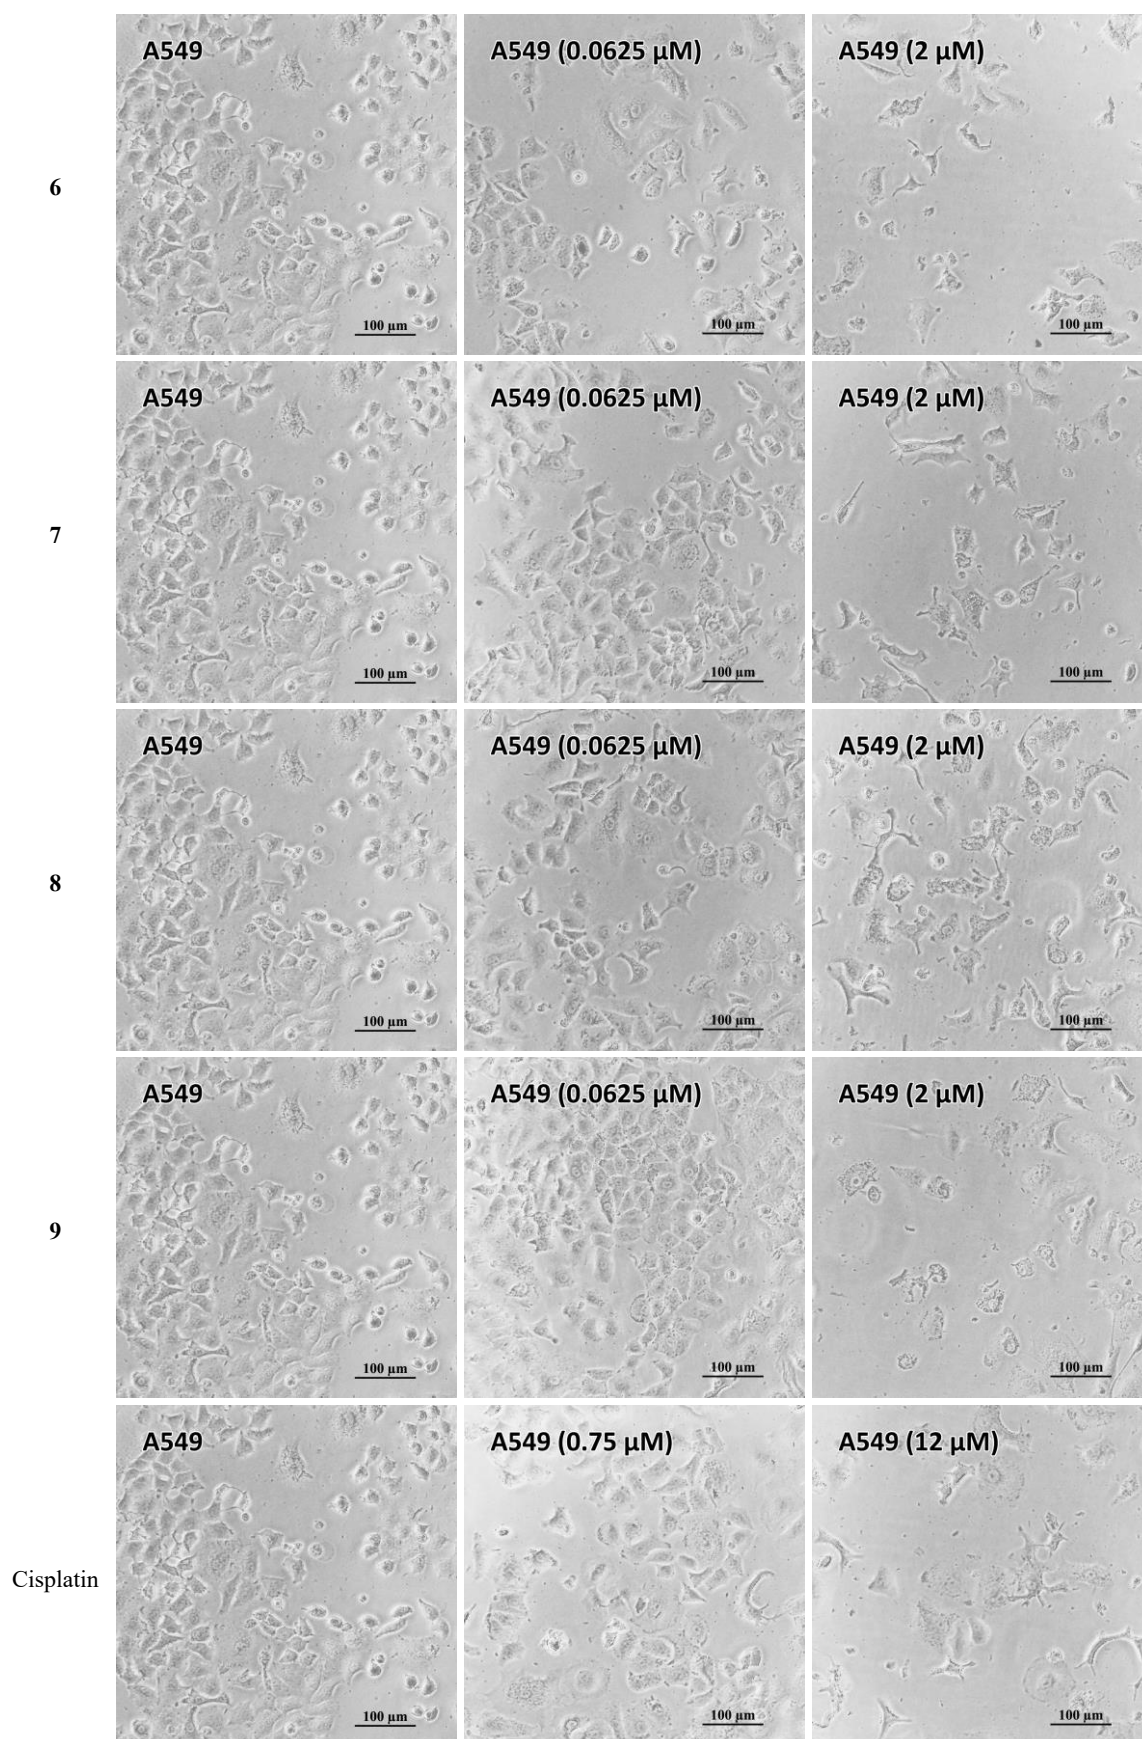

**Figure S29** The microscopic photographs of the A549 cancer cell treated with increased concentrations of the compounds 1–9 and cisplatin at magnification of 200 $\times$ .

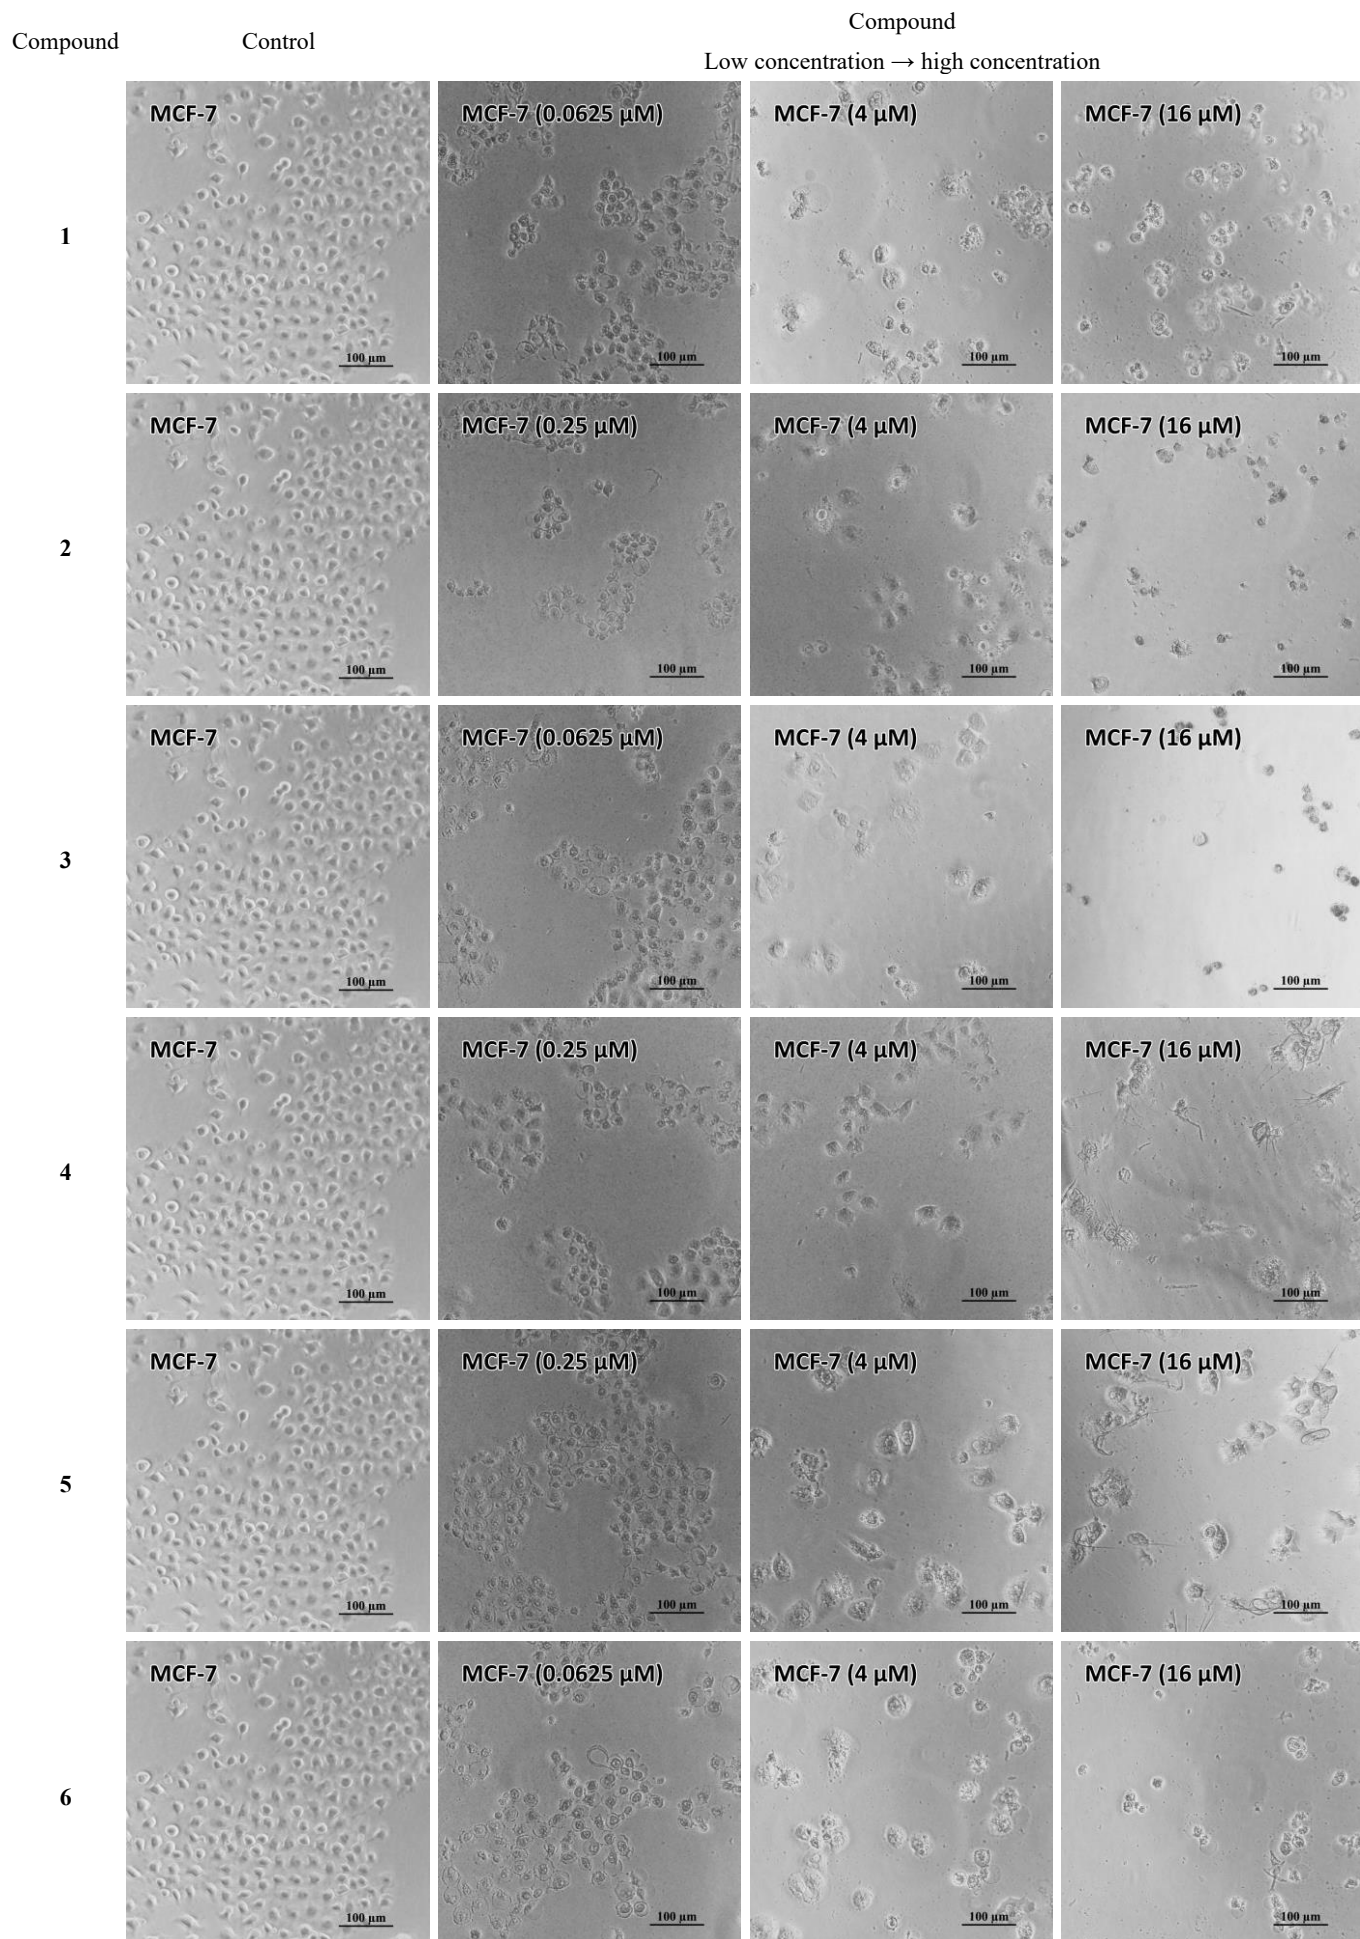



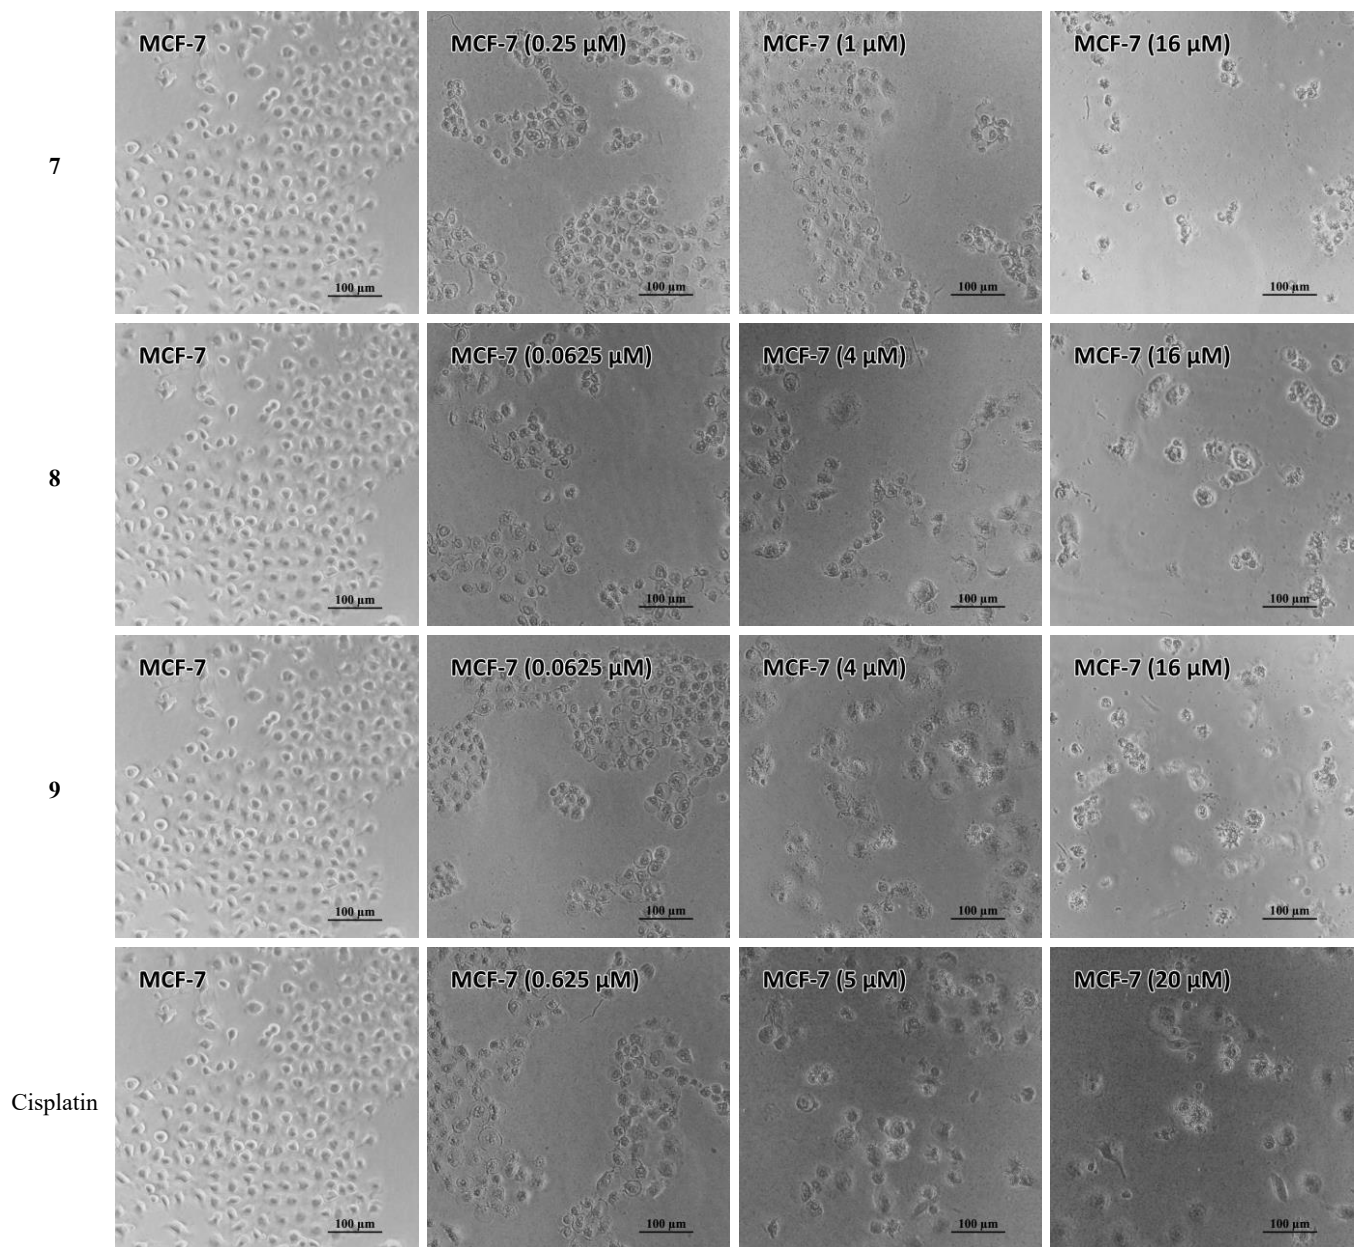

**Figure S30** The microscopic photographs of the MCF-7 cancer cell treated with increased concentrations of the compounds **1–9** and cisplatin at magnification of 200 $\times$ .



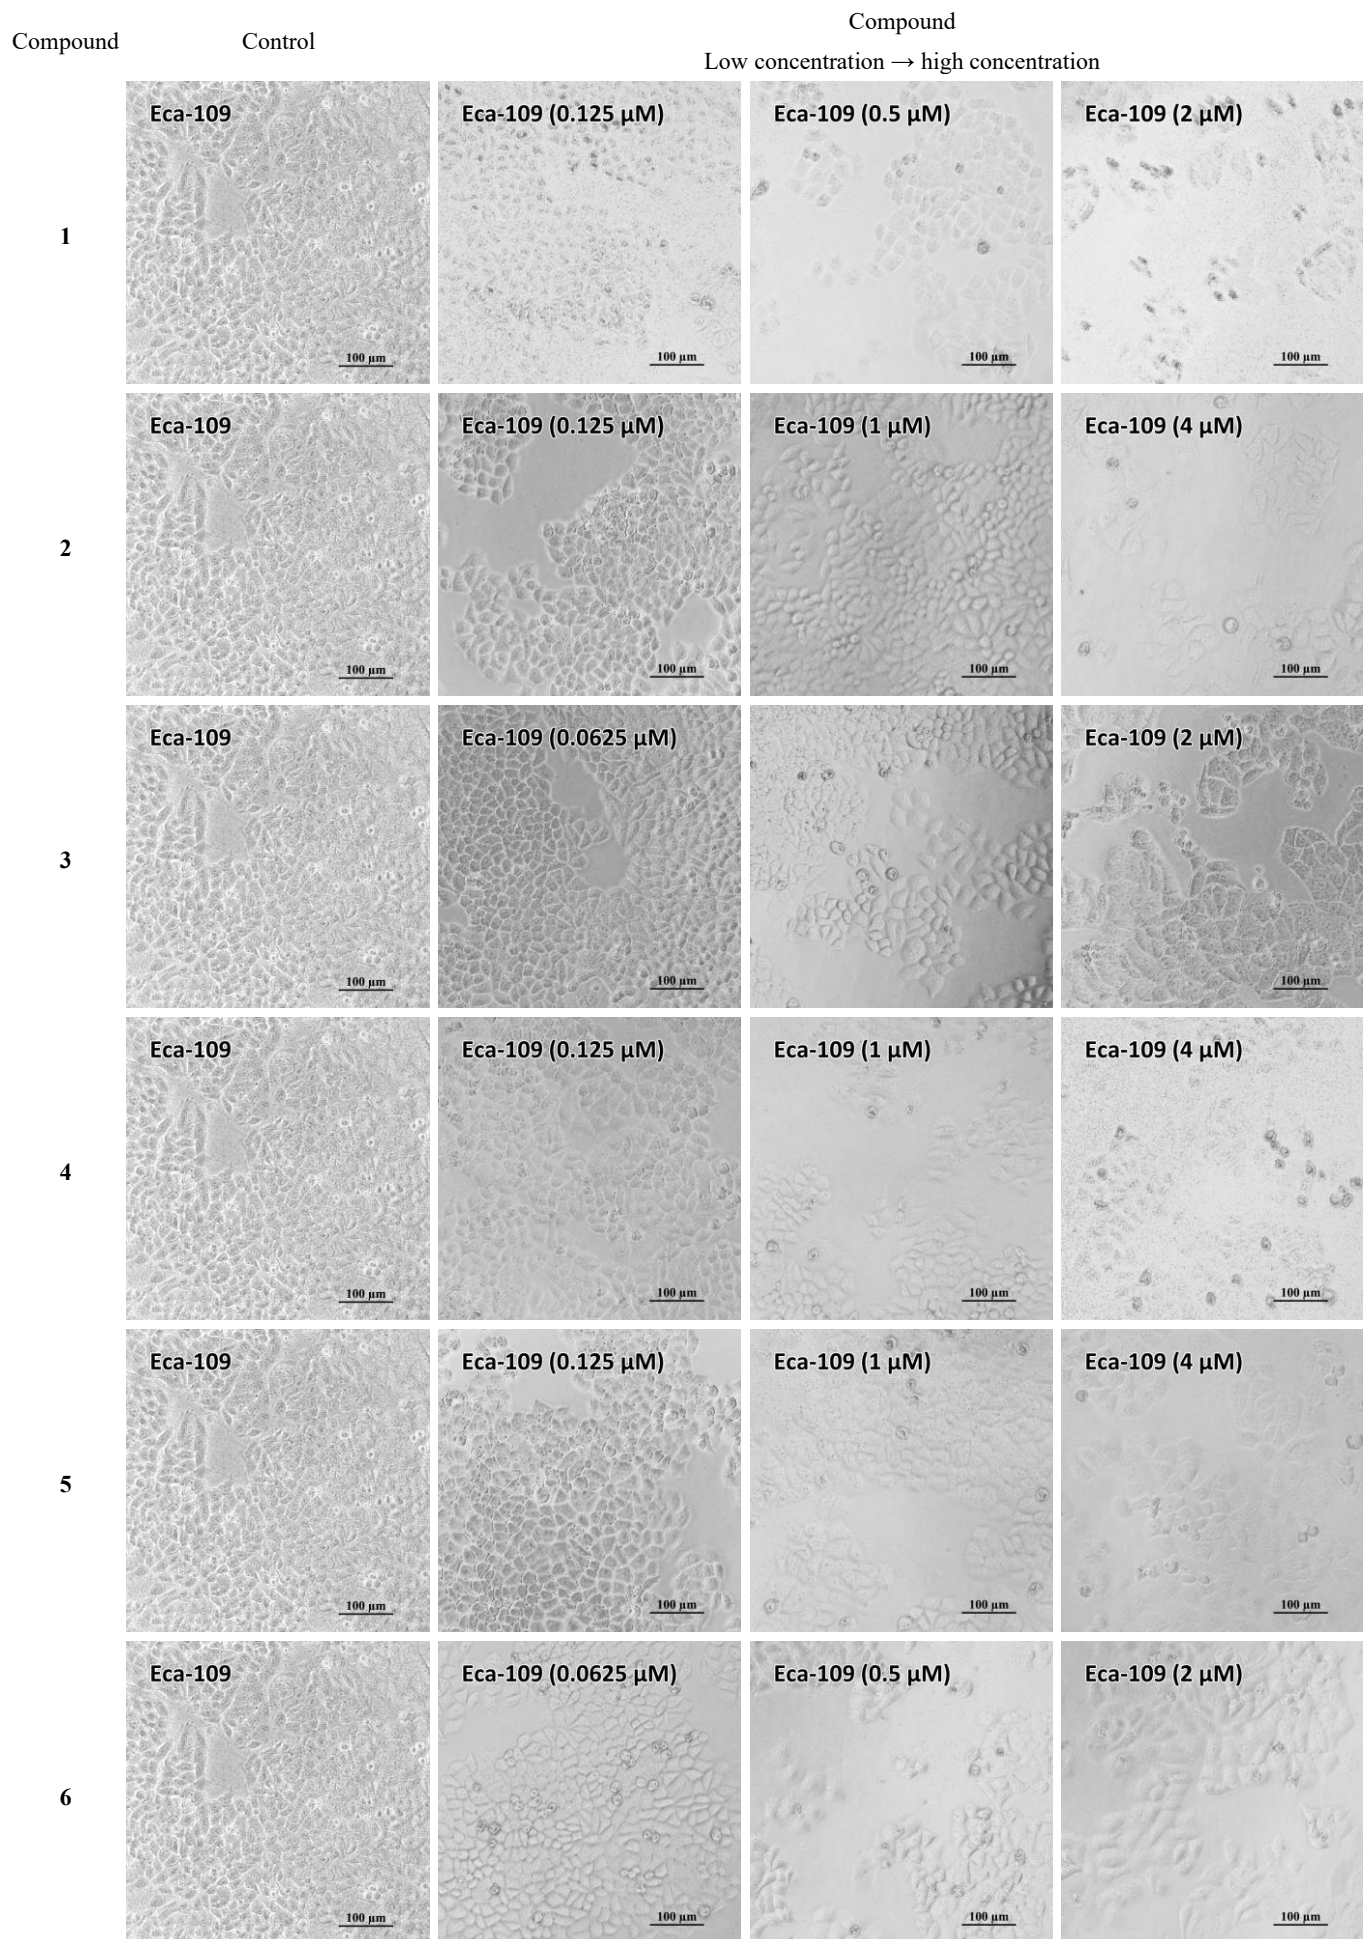

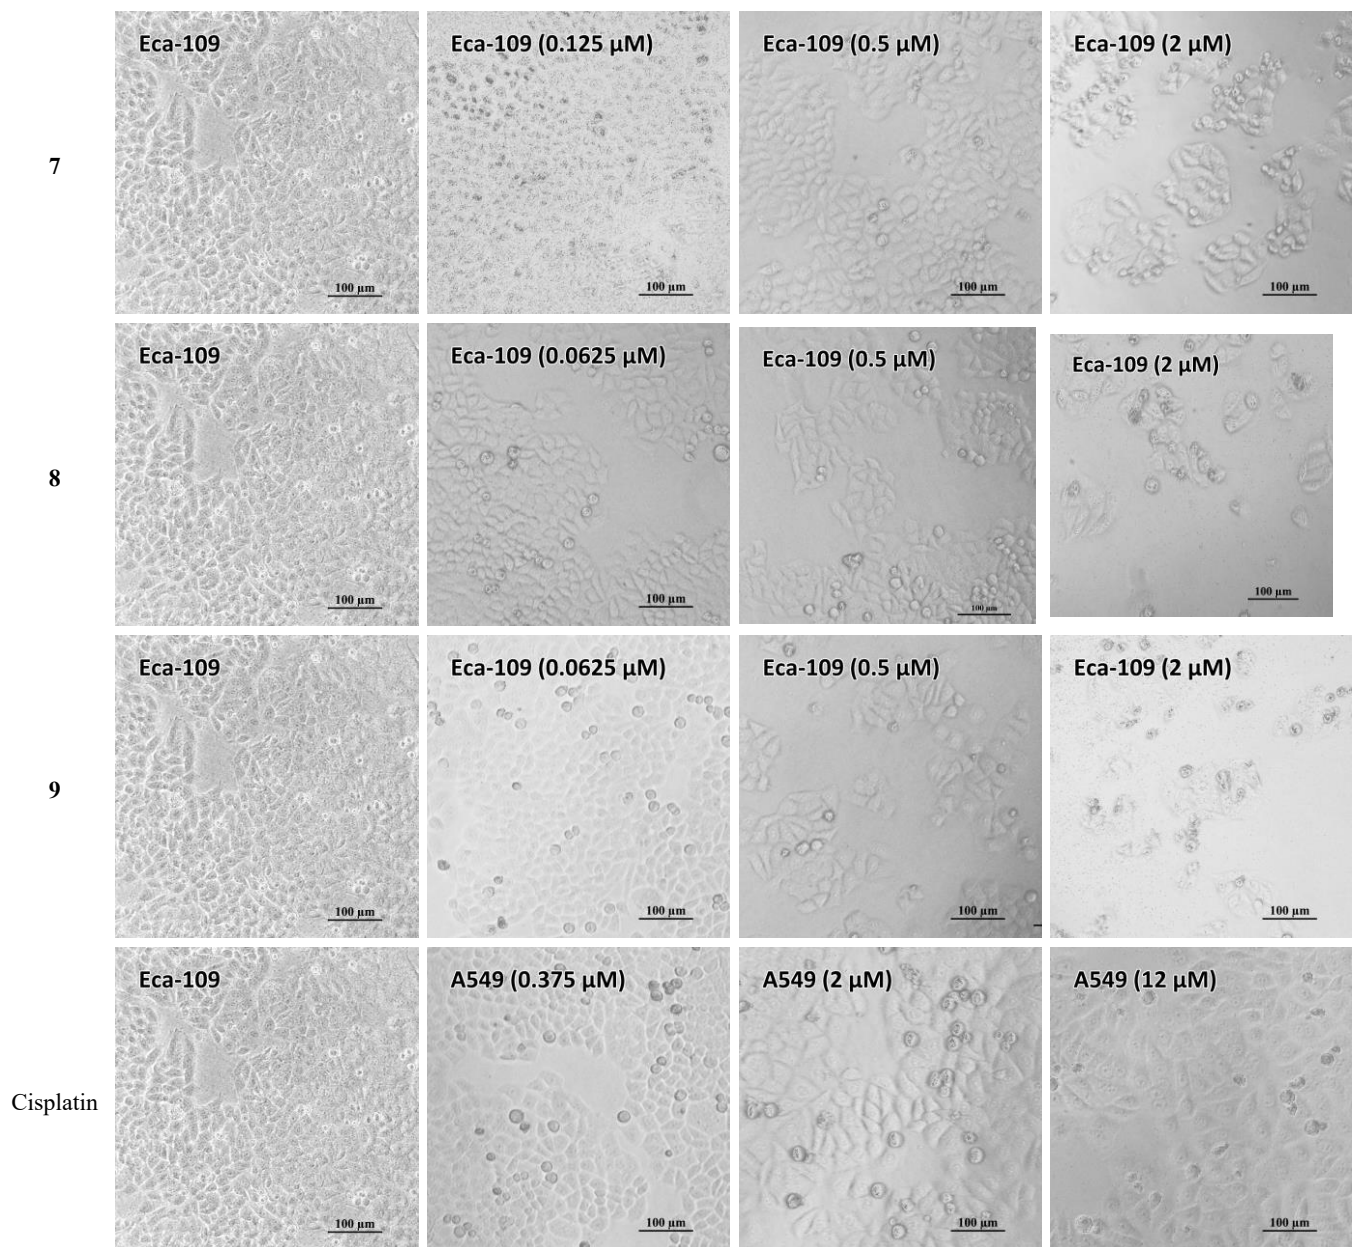

**Figure S31** The microscopic photographs of the Eca-109 cancer cell treated with increased concentrations of the compounds **1–9** and cisplatin at magnification of 200 $\times$ .

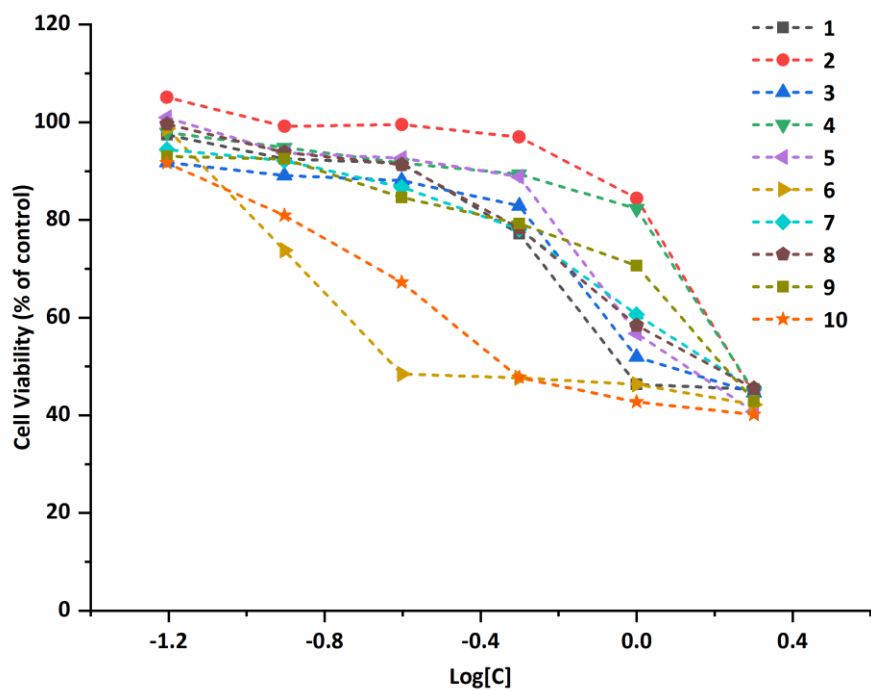

**Figure S32** The plots of the cell viability vs. the concentration of compounds **1–10** against Bel-7402 cell line.

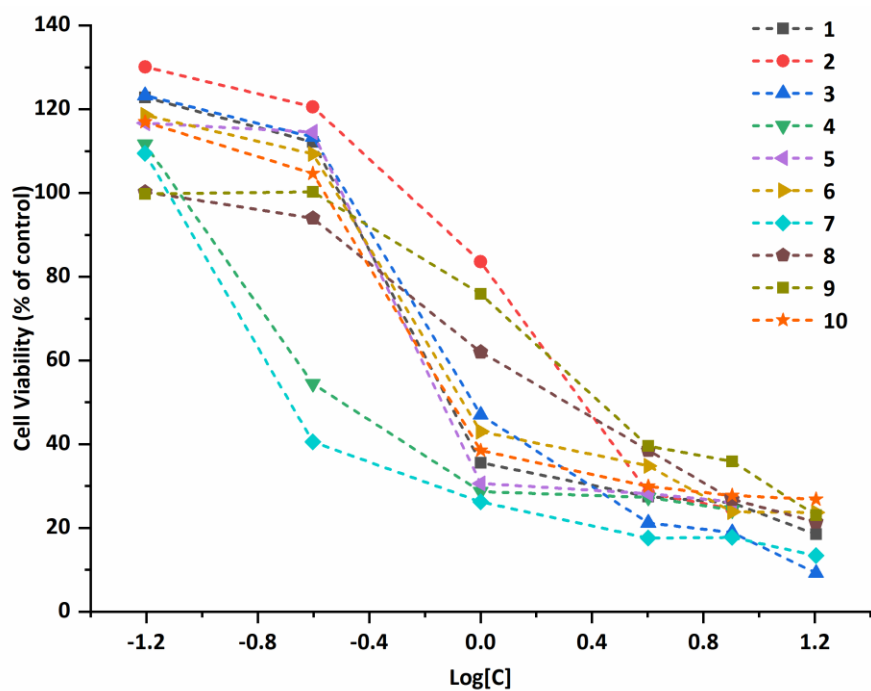

**Figure S33** The plots of the cell viability vs. the concentration of compounds **1–10** against MCF-7 cell line.

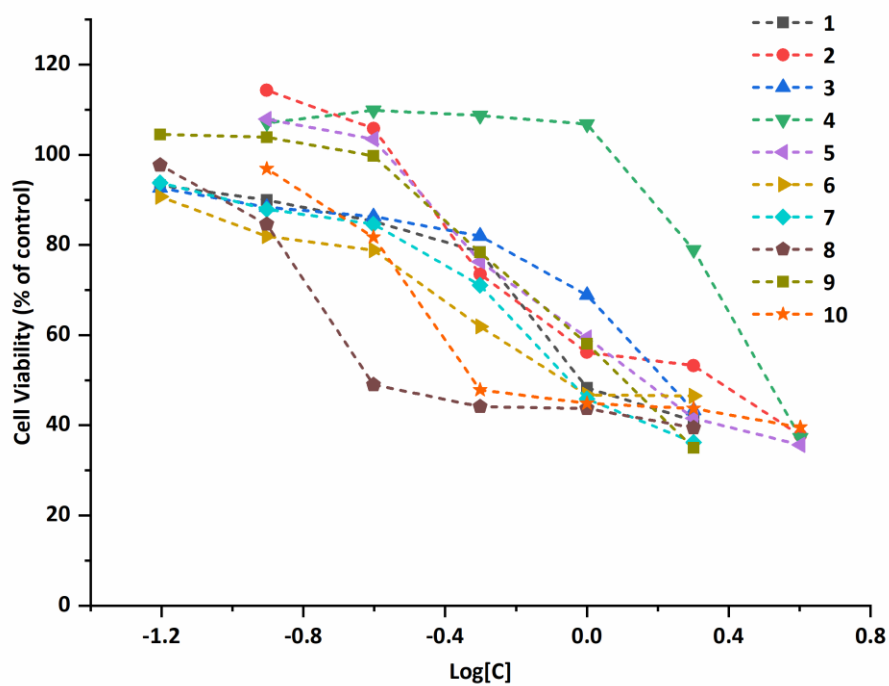

**Figure S34** The plots of the cell viability vs. the concentration of compounds **1–10** against Eca-109 cell line.

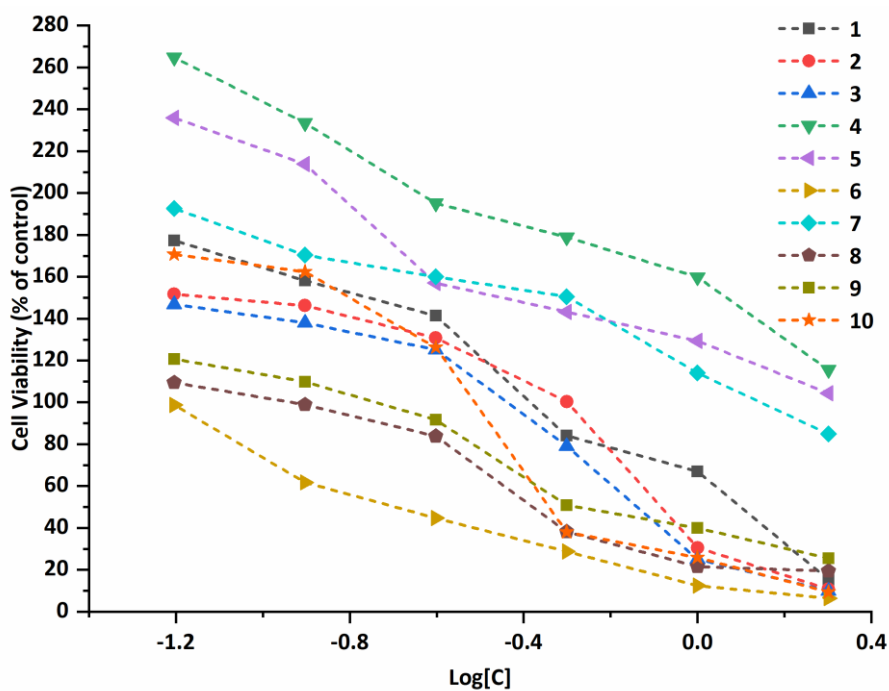

**Figure S35** The plots of the cell viability vs. the concentration of compounds **1–10** against RAW 264.7 cell line.

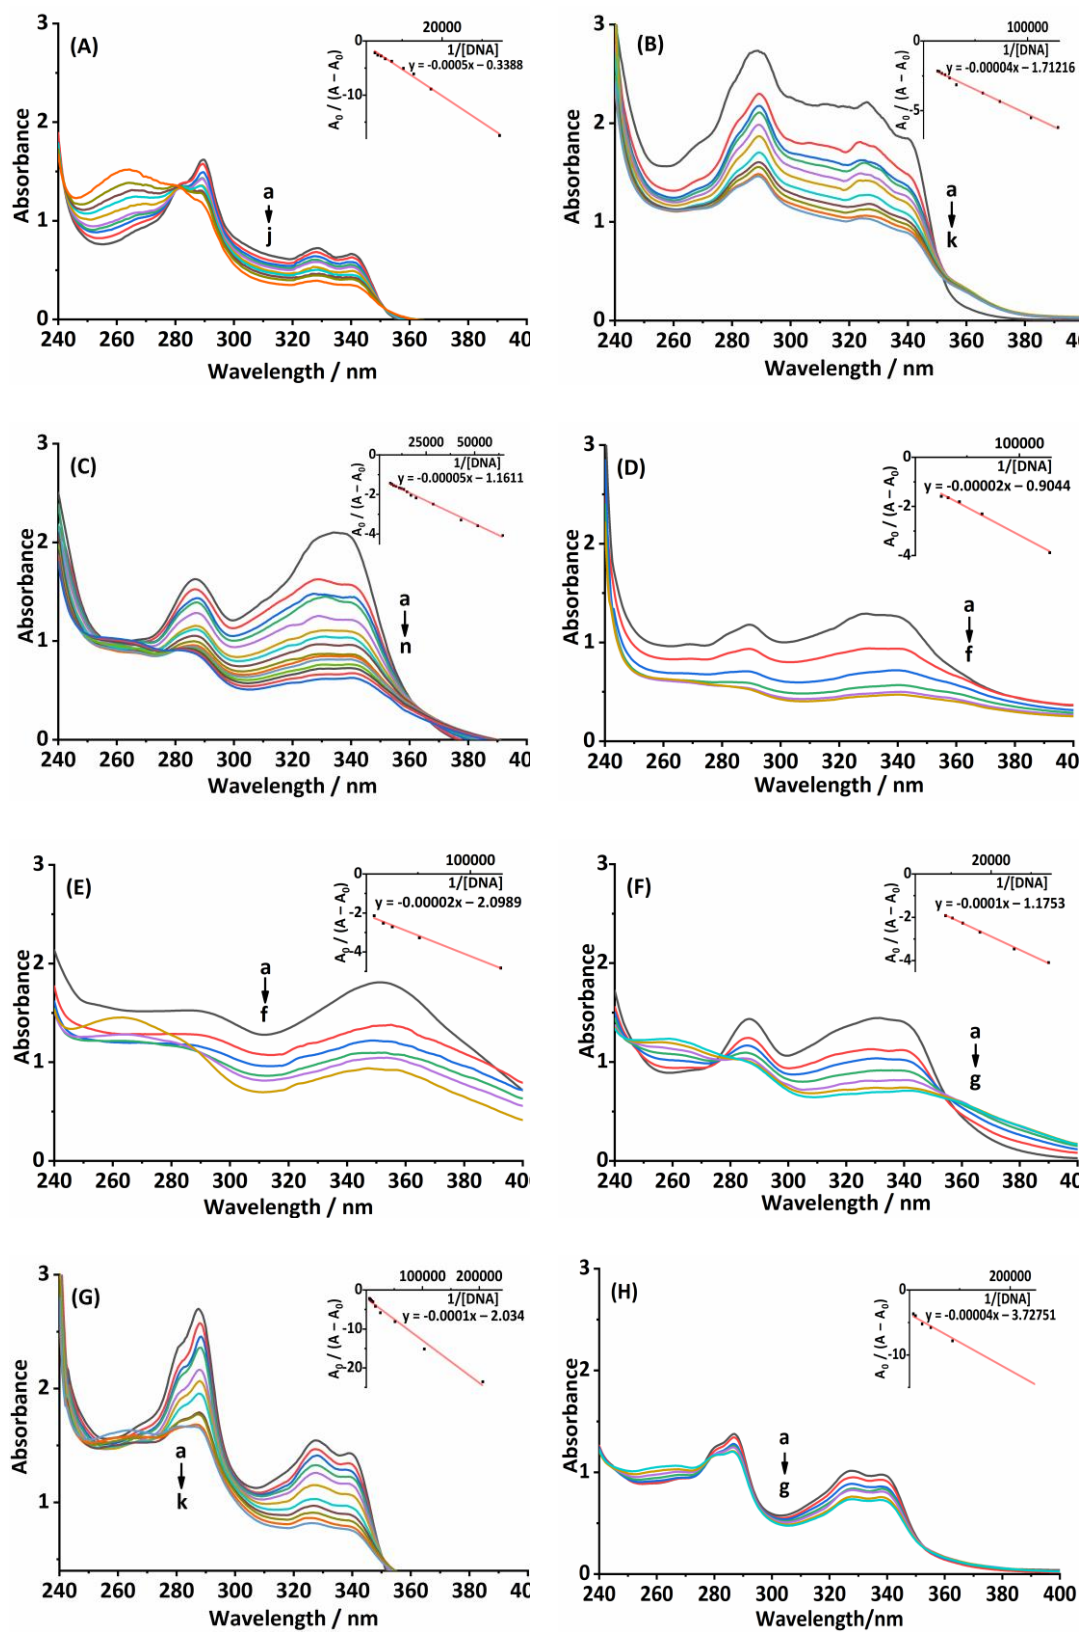

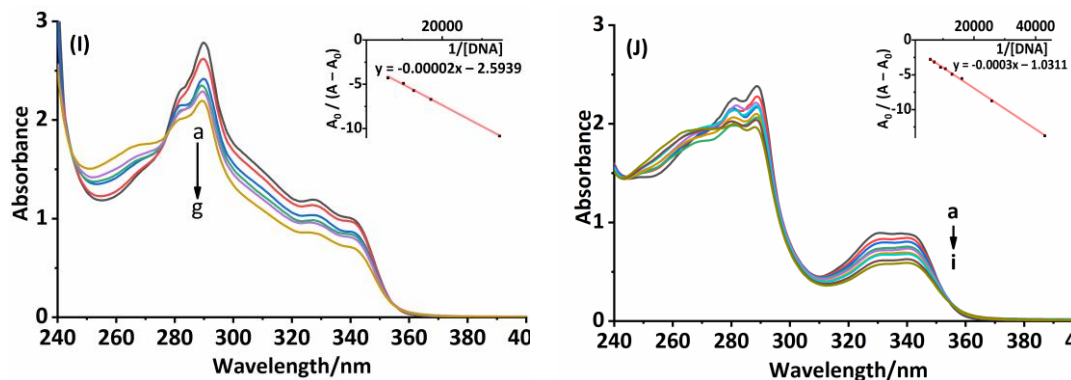

**Figure S36** UV-vis spectra for compounds **1–10** in Tris-HCl  $1.0 \times 10^{-3}$  (pH 7.2) with increasing the concentration of CT-DNA, and the inset show plots of  $A_0/(A-A_0)$  versus the concentration of CT-DNA. (A)  $c(\mathbf{1}) = 67 \mu\text{M}$ ;  $c(\text{CT-DNA}) = 0, 30, 60, 80, 100, 140, 180, 220, 260$  and  $320 \mu\text{M}$  corresponding to the curves from a to j, respectively. (B)  $c(\mathbf{2}) = 100 \mu\text{M}$ ;  $c(\text{CT-DNA}) = 0, 8, 10, 14, 18, 32, 40, 48, 56, 64$ , and  $72 \mu\text{M}$  corresponding to the curves from a to k, respectively. (C)  $c(\mathbf{3}) = 67 \mu\text{M}$ ;  $c(\text{CT-DNA}) = 0, 16, 20, 36, 52, 60, 68, 76, 84, 92, 108, 124, 140$ , and  $156 \mu\text{M}$  corresponding to the curves from a to n, respectively. (D)  $c(\mathbf{4}) = 100 \mu\text{M}$ ;  $c(\text{CT-DNA}) = 0, 8, 16, 24, 32$ , and  $40 \mu\text{M}$  corresponding to the curves from a to f, respectively. (E)  $c(\mathbf{5}) = 100 \mu\text{M}$ ;  $c(\text{CT-DNA}) = 0, 8, 20, 40, 60$ , and  $120 \mu\text{M}$  corresponding to the curves from a to f, respectively. (F)  $c(\mathbf{6}) = 100 \mu\text{M}$ ;  $c(\text{CT-DNA}) = 0, 30, 40, 60, 80, 100$  and  $120 \mu\text{M}$  corresponding to the curves from a to g, respectively. (G)  $c(\mathbf{7}) = 100 \mu\text{M}$ ;  $c(\text{CT-DNA}) = 0, 5, 10, 20, 40, 60, 80, 100, 120, 140$ , and  $160 \mu\text{M}$  corresponding to the curves from a to k, respectively. (H)  $c(\mathbf{8}) = 100 \mu\text{M}$ ;  $c(\text{CT-DNA}) = 0, 4, 12, 24, 40, 80$  and  $120 \mu\text{M}$  corresponding to the curves from a to g, respectively. (I)  $c(\mathbf{9}) = 100 \mu\text{M}$ ;  $c(\text{CT-DNA}) = 0, 30, 60, 80, 100$  and  $160 \mu\text{M}$  corresponding to the curves from a to f, respectively. (J)  $c(\mathbf{10}) = 80 \mu\text{M}$ ;  $c(\text{CT-DNA}) = 0, 25, 40, 60, 75, 90, 110, 140$  and  $170 \mu\text{M}$  corresponding to the curves from a to i, respectively.



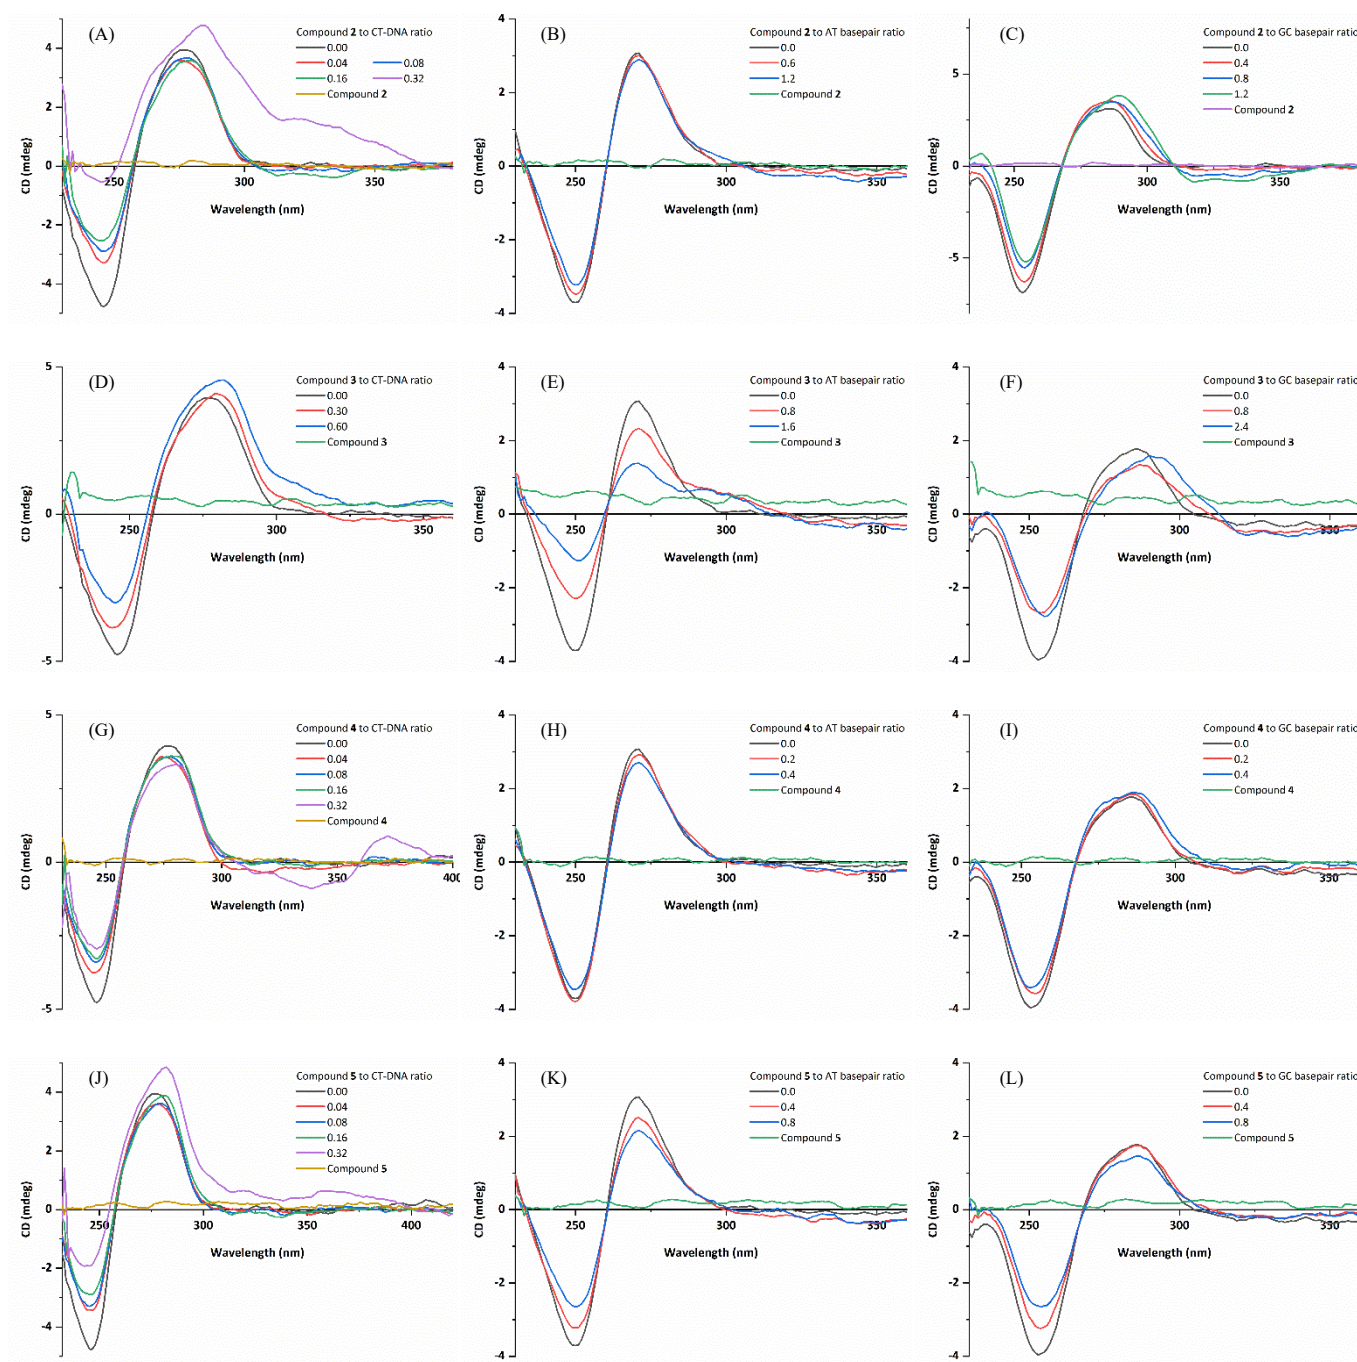

**Figure S37** Circular dichroism spectra of three kinds of DNA in the presence or absence of compounds **2–5** in Tris-HCl buffer (pH 7.2), at 20 °C. (A) CT-DNA ( $4.0 \times 10^{-4}$  M) treated with compound **2**, (B) ds(AT)<sub>6</sub> ( $1.44 \times 10^{-5}$  M) treated with compound **2**, (C) ds(GC)<sub>6</sub> ( $1.58 \times 10^{-5}$  M) treated with compound **2**, (D) CT-DNA ( $4.0 \times 10^{-4}$  M) treated with compound **3**, (E) ds(AT)<sub>6</sub> ( $1.44 \times 10^{-5}$  M) treated with compound **3**, (F) ds(GC)<sub>6</sub> ( $8.7 \times 10^{-6}$  M) treated with compound **3**, (G) CT-DNA ( $4.0 \times 10^{-4}$  M) treated with compound **4**, (H) ds(AT)<sub>6</sub> ( $1.44 \times 10^{-5}$  M) treated with compound **4**, (I) ds(GC)<sub>6</sub> ( $8.7 \times 10^{-6}$  M) treated with compound **4**, (J) CT-DNA ( $4.0 \times 10^{-4}$  M) treated with compound **5**, (K) ds(AT)<sub>6</sub> ( $1.44 \times 10^{-5}$  M) treated with compound **5**, (L) ds(GC)<sub>6</sub> ( $8.7 \times 10^{-6}$  M) treated with compound **5**.

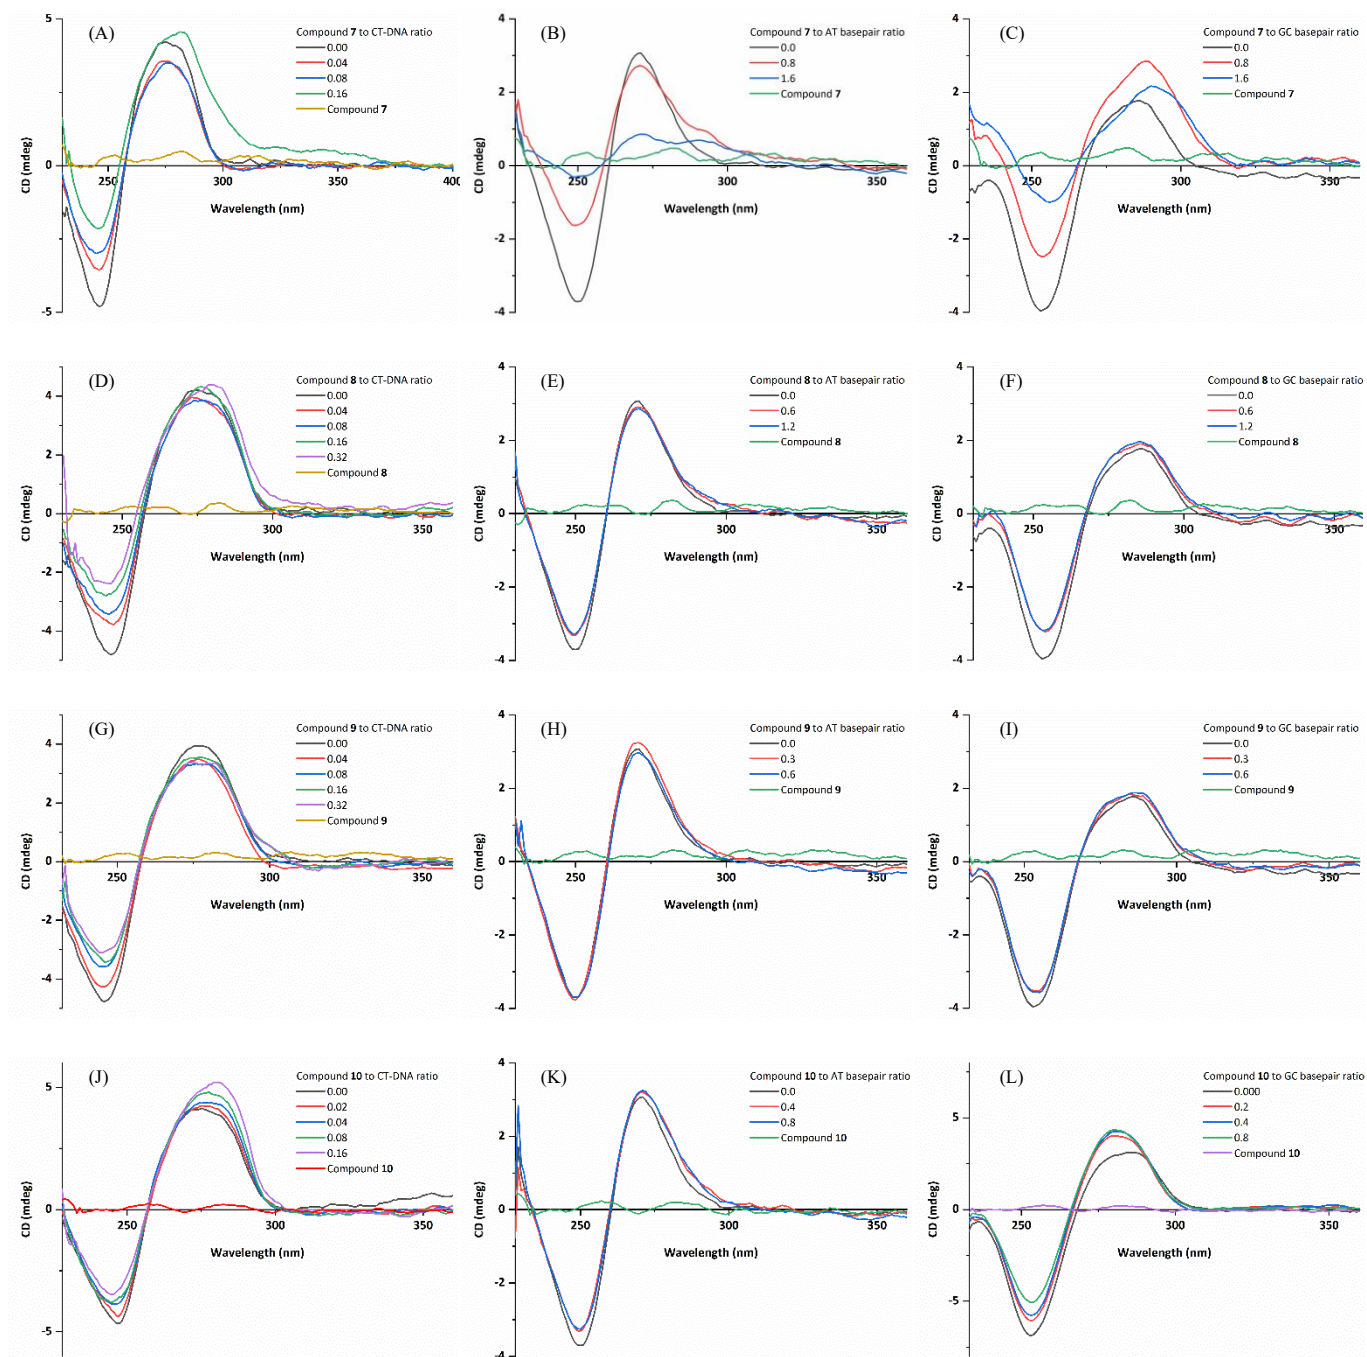

**Figure S38** Circular dichroism spectra of three kinds of DNA in the presence or absence of compounds 7–10 in Tris-HCl buffer (pH 7.2), at 20 °C. (A) CT-DNA ( $4.0 \times 10^{-4}$  M) treated with compound 7, (B) ds(AT)<sub>6</sub> ( $1.44 \times 10^{-5}$  M) treated with compound 7, (C) ds(GC)<sub>6</sub> ( $1.58 \times 10^{-5}$  M) treated with compound 7, (D) CT-DNA ( $4.0 \times 10^{-4}$  M) treated with compound 8, (E) ds(AT)<sub>6</sub> ( $1.44 \times 10^{-5}$  M) treated with compound 8, (F) ds(GC)<sub>6</sub> ( $8.7 \times 10^{-6}$  M) treated with compound 8, (G) CT-DNA ( $4.0 \times 10^{-4}$  M) treated with compound 9, (H) ds(AT)<sub>6</sub> ( $1.44 \times 10^{-5}$  M) treated with compound 9, (I) ds(GC)<sub>6</sub> ( $8.7 \times 10^{-6}$  M) treated with compound 9, (J) CT-DNA ( $4.0 \times 10^{-4}$  M) treated with compound 10, (K) ds(AT)<sub>6</sub> ( $1.44 \times 10^{-5}$  M) treated with compound 10, (L) ds(GC)<sub>6</sub> ( $1.58 \times 10^{-5}$  M) treated with compound 10.



**Table S1** CD spectra bands of CT-DNA, ds(AT)<sub>6</sub>, ds(GC)<sub>6</sub> and with compounds **1–10**: wavelength  $\lambda$   
(degree of ellipticity,  $\Phi$ )

|                                                                              | $\lambda/\text{nm}$ ( $\Phi/^\circ$ ) |           |
|------------------------------------------------------------------------------|---------------------------------------|-----------|
|                                                                              | (-) band                              | (+) band  |
| 400 $\mu\text{M}$ CT-DNA                                                     | 246(-4.77)                            | 277(3.94) |
| 400 $\mu\text{M}$ CT-DNA + 128 $\mu\text{M}$ compound <b>1</b>               | 245(-3.79)                            | 279(4.69) |
| 400 $\mu\text{M}$ CT-DNA + 256 $\mu\text{M}$ compound <b>1</b>               | 245(-3.04)                            | 279(4.73) |
| 400 $\mu\text{M}$ CT-DNA + 512 $\mu\text{M}$ compound <b>1</b>               | 244(-2.53)                            | 282(6.45) |
| 400 $\mu\text{M}$ CT-DNA + 16 $\mu\text{M}$ compound <b>2</b>                | 246(-3.30)                            | 276(3.57) |
| 400 $\mu\text{M}$ CT-DNA + 32 $\mu\text{M}$ compound <b>2</b>                | 246(-2.89)                            | 277(3.67) |
| 400 $\mu\text{M}$ CT-DNA + 64 $\mu\text{M}$ compound <b>2</b>                | 245(-2.54)                            | 278(3.59) |
| 400 $\mu\text{M}$ CT-DNA + 128 $\mu\text{M}$ compound <b>2</b>               | 245(-0.55)                            | 285(4.76) |
| 400 $\mu\text{M}$ CT-DNA + 160 $\mu\text{M}$ compound <b>3</b>               | 245(-3.85)                            | 280(4.07) |
| 400 $\mu\text{M}$ CT-DNA + 320 $\mu\text{M}$ compound <b>3</b>               | 245(-3.02)                            | 282(4.55) |
| 400 $\mu\text{M}$ CT-DNA + 16 $\mu\text{M}$ compound <b>4</b>                | 245(-3.76)                            | 274(3.60) |
| 400 $\mu\text{M}$ CT-DNA + 32 $\mu\text{M}$ compound <b>4</b>                | 246(-3.40)                            | 277(3.56) |
| 400 $\mu\text{M}$ CT-DNA + 64 $\mu\text{M}$ compound <b>4</b>                | 246(-3.29)                            | 281(3.59) |
| 400 $\mu\text{M}$ CT-DNA + 128 $\mu\text{M}$ compound <b>4</b>               | 246(-2.94)                            | 281(3.30) |
| 400 $\mu\text{M}$ CT-DNA + 16 $\mu\text{M}$ compound <b>5</b>                | 246(-3.42)                            | 278(3.59) |
| 400 $\mu\text{M}$ CT-DNA + 32 $\mu\text{M}$ compound <b>5</b>                | 245(-3.29)                            | 280(3.61) |
| 400 $\mu\text{M}$ CT-DNA + 64 $\mu\text{M}$ compound <b>5</b>                | 245(-2.90)                            | 282(3.88) |
| 400 $\mu\text{M}$ CT-DNA + 128 $\mu\text{M}$ compound <b>5</b>               | 243(-1.93)                            | 282(4.85) |
| 400 $\mu\text{M}$ CT-DNA + 8 $\mu\text{M}$ compound <b>6</b>                 | 246(-3.54)                            | 277(3.60) |
| 400 $\mu\text{M}$ CT-DNA + 16 $\mu\text{M}$ compound <b>6</b>                | 246(-3.62)                            | 277(3.39) |
| 400 $\mu\text{M}$ CT-DNA + 32 $\mu\text{M}$ compound <b>6</b>                | 246(-3.19)                            | 277(3.42) |
| 400 $\mu\text{M}$ CT-DNA + 64 $\mu\text{M}$ compound <b>6</b>                | 246(-2.34)                            | 279(3.64) |
| 400 $\mu\text{M}$ CT-DNA + 128 $\mu\text{M}$ compound <b>6</b>               | 246(-1.28)                            | 283(4.47) |
| 400 $\mu\text{M}$ CT-DNA + 256 $\mu\text{M}$ compound <b>6</b>               | 246(0.66)                             | 288(5.71) |
| 400 $\mu\text{M}$ CT-DNA + 8 $\mu\text{M}$ compound <b>7</b>                 | 246(-3.57)                            | 275(3.54) |
| 400 $\mu\text{M}$ CT-DNA + 32 $\mu\text{M}$ compound <b>7</b>                | 246(-2.96)                            | 278(3.48) |
| 400 $\mu\text{M}$ CT-DNA + 64 $\mu\text{M}$ compound <b>7</b>                | 246(-2.15)                            | 281(4.55) |
| 400 $\mu\text{M}$ CT-DNA + 16 $\mu\text{M}$ compound <b>8</b>                | 247(-3.79)                            | 274(3.95) |
| 400 $\mu\text{M}$ CT-DNA + 32 $\mu\text{M}$ compound <b>8</b>                | 246(-3.44)                            | 276(3.85) |
| 400 $\mu\text{M}$ CT-DNA + 64 $\mu\text{M}$ compound <b>8</b>                | 245(-2.79)                            | 277(4.31) |
| 400 $\mu\text{M}$ CT-DNA + 128 $\mu\text{M}$ compound <b>8</b>               | 245(-2.37)                            | 279(4.40) |
| 400 $\mu\text{M}$ CT-DNA + 16 $\mu\text{M}$ compound <b>9</b>                | 246(-4.27)                            | 276(3.48) |
| 400 $\mu\text{M}$ CT-DNA + 32 $\mu\text{M}$ compound <b>9</b>                | 246(-3.59)                            | 277(3.32) |
| 400 $\mu\text{M}$ CT-DNA + 64 $\mu\text{M}$ compound <b>9</b>                | 246(-3.43)                            | 277(3.56) |
| 400 $\mu\text{M}$ CT-DNA + 128 $\mu\text{M}$ compound <b>9</b>               | 245(-3.11)                            | 280(3.35) |
| 400 $\mu\text{M}$ CT-DNA + 8 $\mu\text{M}$ compound <b>10</b>                | 246(-4.35)                            | 277(4.21) |
| 400 $\mu\text{M}$ CT-DNA + 16 $\mu\text{M}$ compound <b>10</b>               | 246(-3.87)                            | 278(4.35) |
| 400 $\mu\text{M}$ CT-DNA + 32 $\mu\text{M}$ compound <b>10</b>               | 245(-3.80)                            | 278(4.82) |
| 400 $\mu\text{M}$ CT-DNA + 64 $\mu\text{M}$ compound <b>10</b>               | 245(-3.48)                            | 280(5.20) |
| 15.7 $\mu\text{M}$ ds(AT) <sub>6</sub>                                       | 250(-4.43)                            | 271(3.59) |
| 15.7 $\mu\text{M}$ ds(AT) <sub>6</sub> + 160 $\mu\text{M}$ compound <b>1</b> | 249(-2.97)                            | 271(3.00) |
| 15.7 $\mu\text{M}$ ds(AT) <sub>6</sub> + 320 $\mu\text{M}$ compound <b>1</b> | 251(-0.82)                            | 275(1.40) |
| 15.7 $\mu\text{M}$ ds(AT) <sub>6</sub> + 480 $\mu\text{M}$ compound <b>1</b> | 251(-0.37)                            | 275(1.09) |
| 14.4 $\mu\text{M}$ ds(AT) <sub>6</sub>                                       | 250(-3.70)                            | 271(3.07) |
| 14.4 $\mu\text{M}$ ds(AT) <sub>6</sub> + 108 $\mu\text{M}$ compound <b>2</b> | 250(-3.48)                            | 271(3.00) |
| 14.4 $\mu\text{M}$ ds(AT) <sub>6</sub> + 180 $\mu\text{M}$ compound <b>2</b> | 250(-3.23)                            | 271(2.90) |
| 14.4 $\mu\text{M}$ ds(AT) <sub>6</sub> + 144 $\mu\text{M}$ compound <b>3</b> | 250(-2.30)                            | 271(2.33) |
| 14.4 $\mu\text{M}$ ds(AT) <sub>6</sub> + 288 $\mu\text{M}$ compound <b>3</b> | 251(-1.27)                            | 271(1.38) |
| 14.4 $\mu\text{M}$ ds(AT) <sub>6</sub> + 36 $\mu\text{M}$ compound <b>4</b>  | 250(-3.79)                            | 271(2.92) |
| 14.4 $\mu\text{M}$ ds(AT) <sub>6</sub> + 72 $\mu\text{M}$ compound <b>4</b>  | 250(-3.46)                            | 271(2.70) |
| 14.4 $\mu\text{M}$ ds(AT) <sub>6</sub> + 72 $\mu\text{M}$ compound <b>5</b>  | 250(-3.22)                            | 271(2.51) |
| 14.4 $\mu\text{M}$ ds(AT) <sub>6</sub> + 144 $\mu\text{M}$ compound <b>5</b> | 250(-2.65)                            | 271(2.16) |
| 14.4 $\mu\text{M}$ ds(AT) <sub>6</sub> + 108 $\mu\text{M}$ compound <b>6</b> | 251(-2.11)                            | 271(2.33) |
| 14.4 $\mu\text{M}$ ds(AT) <sub>6</sub> + 216 $\mu\text{M}$ compound <b>6</b> | 253(-0.33)                            | 271(0.84) |
| 14.4 $\mu\text{M}$ ds(AT) <sub>6</sub> + 144 $\mu\text{M}$ compound <b>7</b> | 249(-1.63)                            | 271(2.72) |
| 14.4 $\mu\text{M}$ ds(AT) <sub>6</sub> + 288 $\mu\text{M}$ compound <b>7</b> | 249(-0.31)                            | 271(0.86) |
| 14.4 $\mu\text{M}$ ds(AT) <sub>6</sub> + 108 $\mu\text{M}$ compound <b>8</b> | 250(-3.28)                            | 271(2.86) |
| 14.4 $\mu\text{M}$ ds(AT) <sub>6</sub> + 216 $\mu\text{M}$ compound <b>8</b> | 250(-3.32)                            | 271(2.90) |
| 14.4 $\mu\text{M}$ ds(AT) <sub>6</sub> + 72 $\mu\text{M}$ compound <b>9</b>  | 251(-3.70)                            | 271(2.97) |
| 14.4 $\mu\text{M}$ ds(AT) <sub>6</sub> + 144 $\mu\text{M}$ compound <b>9</b> | 250(-3.78)                            | 271(3.24) |

|                                                                               |            |           |
|-------------------------------------------------------------------------------|------------|-----------|
| 14.4 $\mu\text{M}$ ds(AT) <sub>6</sub> + 72 $\mu\text{M}$ compound <b>10</b>  | 250(-3.31) | 271(3.21) |
| 14.4 $\mu\text{M}$ ds(AT) <sub>6</sub> + 144 $\mu\text{M}$ compound <b>10</b> | 250(-3.26) | 271(3.25) |
| 15.8 $\mu\text{M}$ ds(GC) <sub>6</sub>                                        | 253(-7.10) | 284(3.27) |
| 15.8 $\mu\text{M}$ ds(GC) <sub>6</sub> + 160 $\mu\text{M}$ compound <b>1</b>  | 254(-4.56) | 286(3.69) |
| 15.8 $\mu\text{M}$ ds(GC) <sub>6</sub> + 320 $\mu\text{M}$ compound <b>1</b>  | 257(-2.23) | 296(4.65) |
| 15.8 $\mu\text{M}$ ds(GC) <sub>6</sub> + 400 $\mu\text{M}$ compound <b>1</b>  | 259(-1.49) | 296(5.01) |
| 15.8 $\mu\text{M}$ ds(GC) <sub>6</sub> + 80 $\mu\text{M}$ compound <b>2</b>   | 253(-6.26) | 285(3.52) |
| 15.8 $\mu\text{M}$ ds(GC) <sub>6</sub> + 160 $\mu\text{M}$ compound <b>2</b>  | 253(-5.50) | 287(3.49) |
| 15.8 $\mu\text{M}$ ds(GC) <sub>6</sub> + 320 $\mu\text{M}$ compound <b>2</b>  | 254(-5.20) | 290(3.82) |
| 15.8 $\mu\text{M}$ ds(GC) <sub>6</sub> + 80 $\mu\text{M}$ compound <b>6</b>   | 254(-5.11) | 291(4.16) |
| 15.8 $\mu\text{M}$ ds(GC) <sub>6</sub> + 160 $\mu\text{M}$ compound <b>6</b>  | 255(-1.83) | 295(6.11) |
| 15.8 $\mu\text{M}$ ds(GC) <sub>6</sub> + 320 $\mu\text{M}$ compound <b>6</b>  | 256(0.21)  | 296(6.69) |
| 15.8 $\mu\text{M}$ ds(GC) <sub>6</sub> + 40 $\mu\text{M}$ compound <b>10</b>  | 253(-6.06) | 280(4.01) |
| 15.8 $\mu\text{M}$ ds(GC) <sub>6</sub> + 80 $\mu\text{M}$ compound <b>10</b>  | 253(-5.77) | 281(4.27) |
| 15.8 $\mu\text{M}$ ds(GC) <sub>6</sub> + 160 $\mu\text{M}$ compound <b>10</b> | 253(-5.07) | 280(4.34) |
| 8.7 $\mu\text{M}$ ds(GC) <sub>6</sub>                                         | 253(-3.97) | 286(1.77) |
| 8.7 $\mu\text{M}$ ds(GC) <sub>6</sub> + 90 $\mu\text{M}$ compound <b>3</b>    | 254(-2.68) | 287(1.34) |
| 8.7 $\mu\text{M}$ ds(GC) <sub>6</sub> + 180 $\mu\text{M}$ compound <b>3</b>   | 255(-2.78) | 290(1.58) |
| 8.7 $\mu\text{M}$ ds(GC) <sub>6</sub> + 20 $\mu\text{M}$ compound <b>4</b>    | 255(-3.57) | 286(1.84) |
| 8.7 $\mu\text{M}$ ds(GC) <sub>6</sub> + 40 $\mu\text{M}$ compound <b>4</b>    | 255(-3.35) | 287(1.89) |
| 8.7 $\mu\text{M}$ ds(GC) <sub>6</sub> + 40 $\mu\text{M}$ compound <b>5</b>    | 255(-3.24) | 287(1.75) |
| 8.7 $\mu\text{M}$ ds(GC) <sub>6</sub> + 80 $\mu\text{M}$ compound <b>5</b>    | 255(-2.66) | 287(1.45) |
| 8.7 $\mu\text{M}$ ds(GC) <sub>6</sub> + 90 $\mu\text{M}$ compound <b>7</b>    | 253(-2.47) | 289(2.85) |
| 8.7 $\mu\text{M}$ ds(GC) <sub>6</sub> + 180 $\mu\text{M}$ compound <b>7</b>   | 256(-0.99) | 290(2.16) |
| 8.7 $\mu\text{M}$ ds(GC) <sub>6</sub> + 60 $\mu\text{M}$ compound <b>8</b>    | 254(-3.23) | 286(1.90) |
| 8.7 $\mu\text{M}$ ds(GC) <sub>6</sub> + 120 $\mu\text{M}$ compound <b>8</b>   | 254(-3.18) | 286(1.95) |
| 8.7 $\mu\text{M}$ ds(GC) <sub>6</sub> + 30 $\mu\text{M}$ compound <b>9</b>    | 254(-3.54) | 287(1.80) |
| 8.7 $\mu\text{M}$ ds(GC) <sub>6</sub> + 60 $\mu\text{M}$ compound <b>9</b>    | 254(-3.54) | 289(1.86) |

---

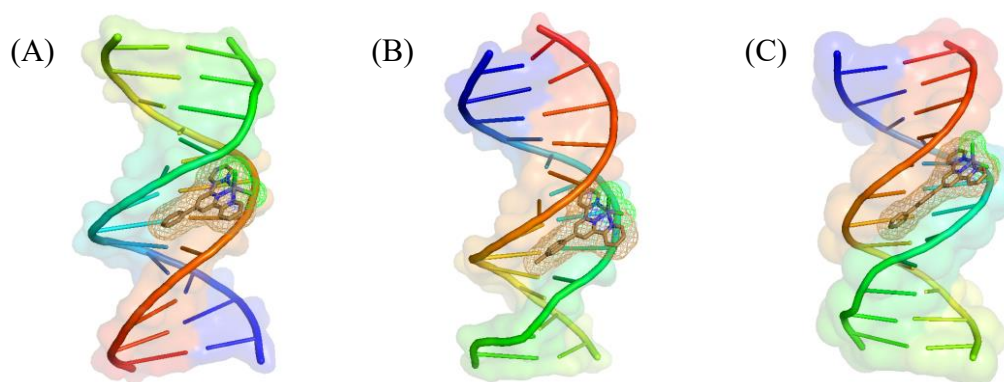

**Figure S39** The most favorable orientation of (A): compound **1**, (B): compound **2** and (C): compound **4** bound with the minor groove of the CT-DNA (PDB ID: 1BNA).

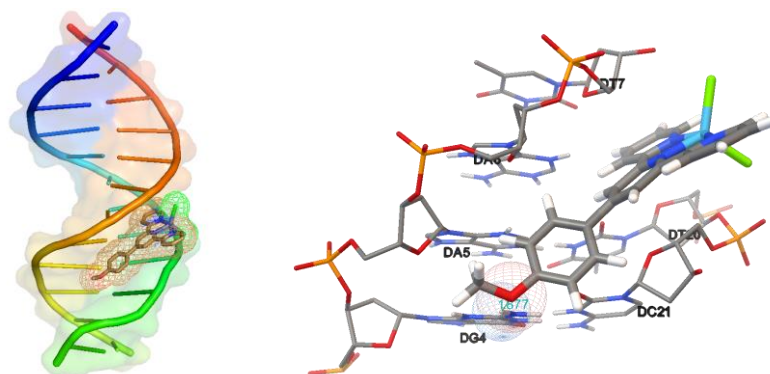

**Figure S40** The most favorable orientation of compound **3** bound with the minor groove of the B-DNA (PDB ID: 1BNA). The formed hydrogen bond and distance have been marked.

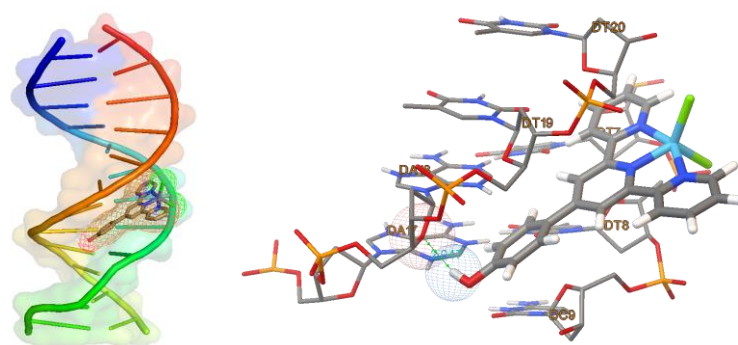

**Figure S41** The most favorable orientation of compound **6** bound with the minor groove of the B-DNA (PDB ID: 1BNA). The formed hydrogen bond and distance have been marked.

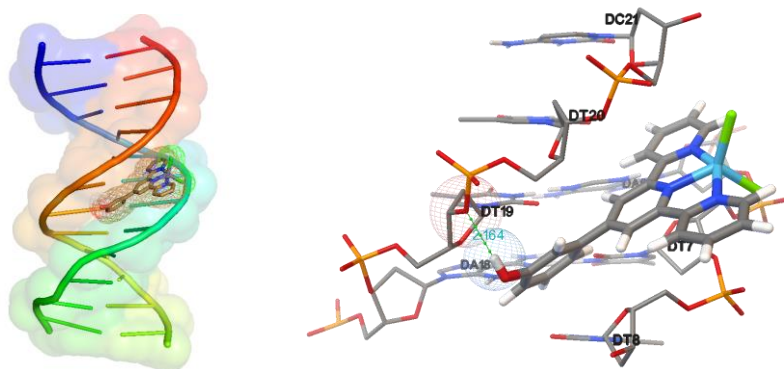

**Figure S42** The most favorable orientation of compound **7** bound with the minor groove of the B-DNA (PDB ID: 1BNA). The formed hydrogen bond and distance have been marked.

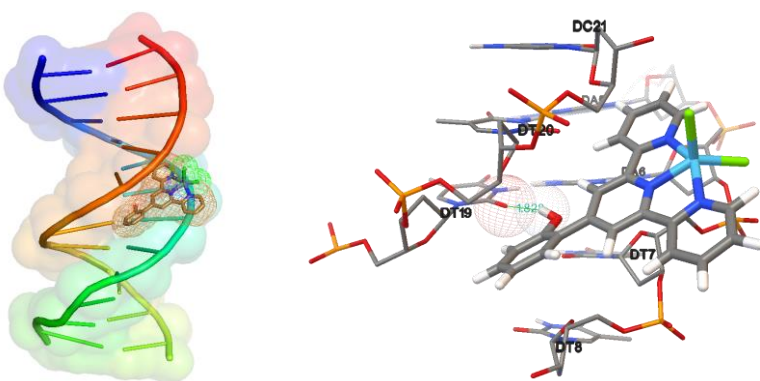

**Figure S43** The most favorable orientation of compound **8** bound with the minor groove of the B-DNA (PDB ID: 1BNA). The formed hydrogen bond and distance have been marked.

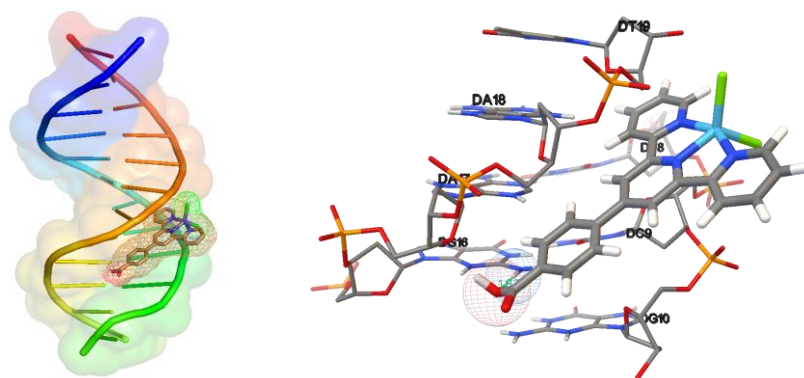

**Figure S44** The most favorable orientation of compound **9** bound with the minor groove of the B-DNA (PDB ID: 1BNA). The formed hydrogen bond and distance have been marked.

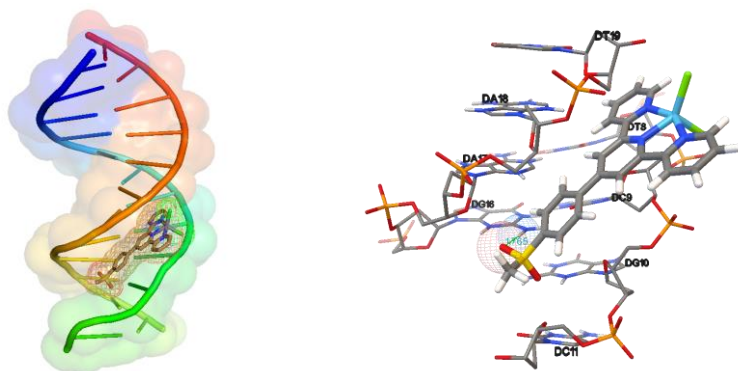

**Figure S45** The most favorable orientation of compound **10** bound with the minor groove of the B-DNA (PDB ID: 1BNA). The formed hydrogen bond and distance have been marked.

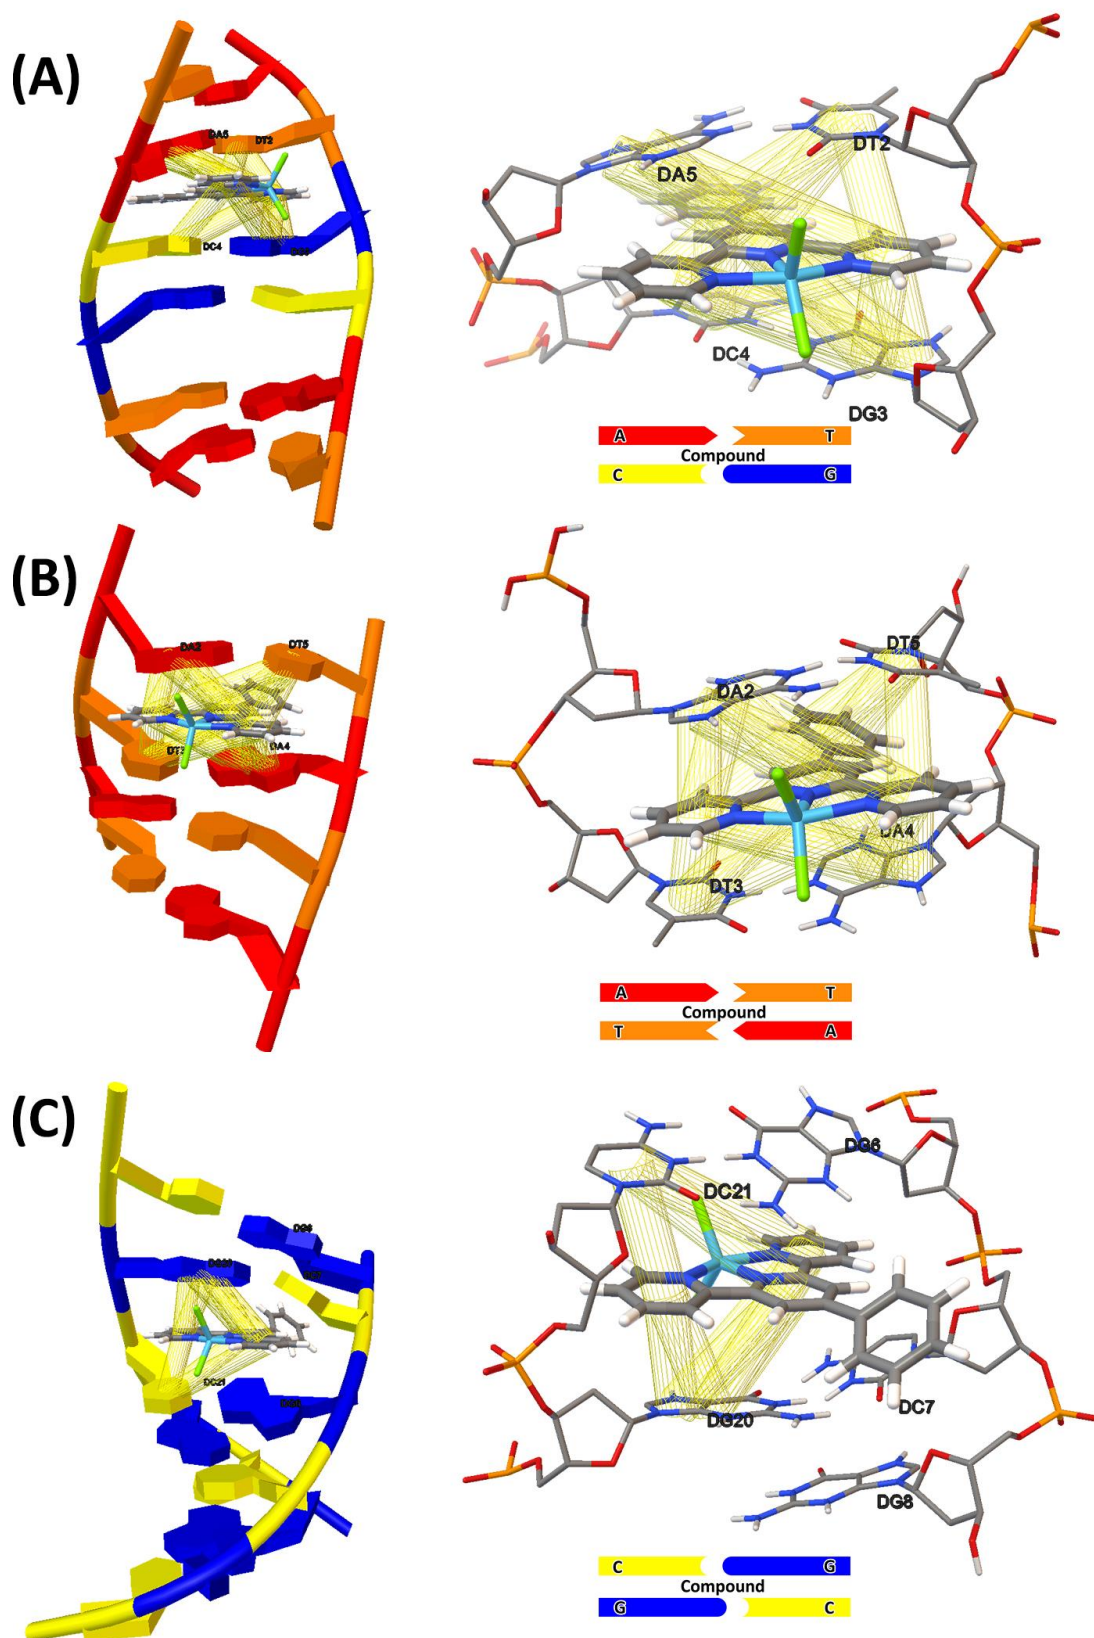

**Figure S46** View of the energy minimized docked poses of compound **1** with (A) ds(ATGCAT)<sub>2</sub> (PDB ID: 4JD8), (B) ds(ATAT)<sub>2</sub> (PDB ID: 2DA8M), and (C) ds(CGCGCG)<sub>2</sub> (PDB ID: 2ROUM).



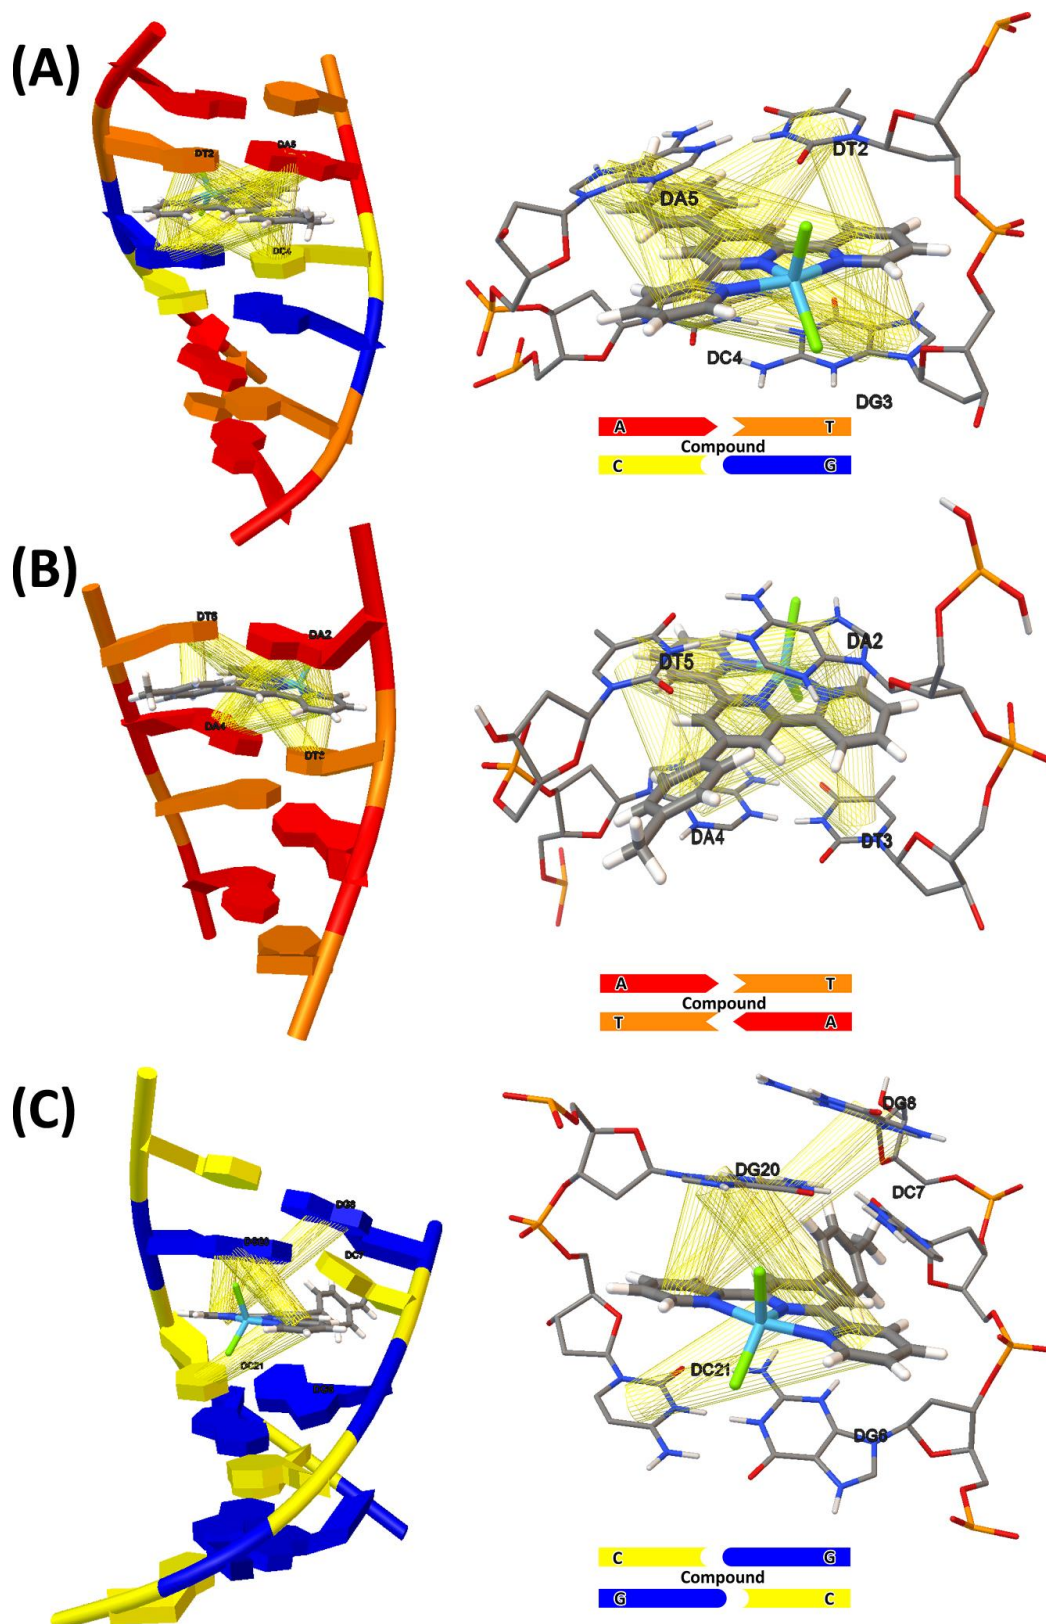

**Figure S47** View of the energy minimized docked poses of compound **2** with (A) ds(ATGCAT)<sub>2</sub> (PDB ID: 4JD8), (B) ds(ATAT)<sub>2</sub> (PDB ID: 2DA8M), and (C) ds(CGCGCG)<sub>2</sub> (PDB ID: 2ROUM).

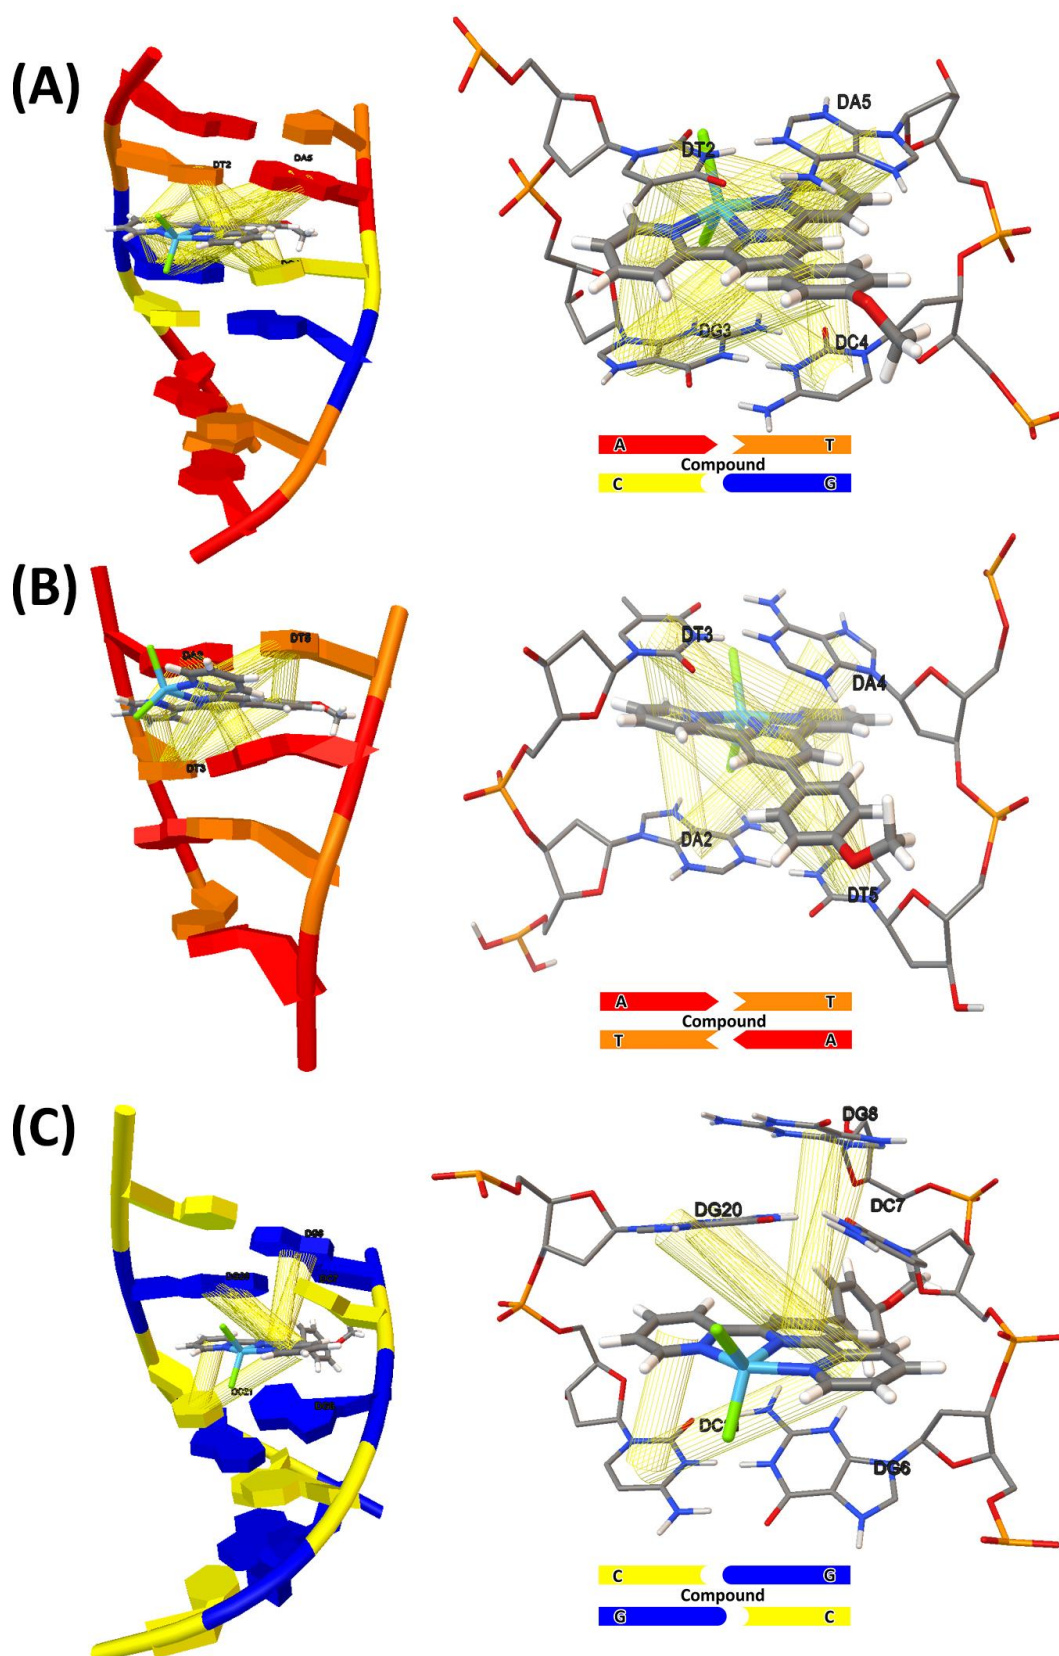

**Figure S48** View of the energy minimized docked poses of compound **3** with (A) ds(ATGCAT)<sub>2</sub> (PDB ID: 4JD8), (B) ds(ATAT)<sub>2</sub> (PDB ID: 2DA8M), and (C) ds(CGCGCG)<sub>2</sub> (PDB ID: 2ROUM).



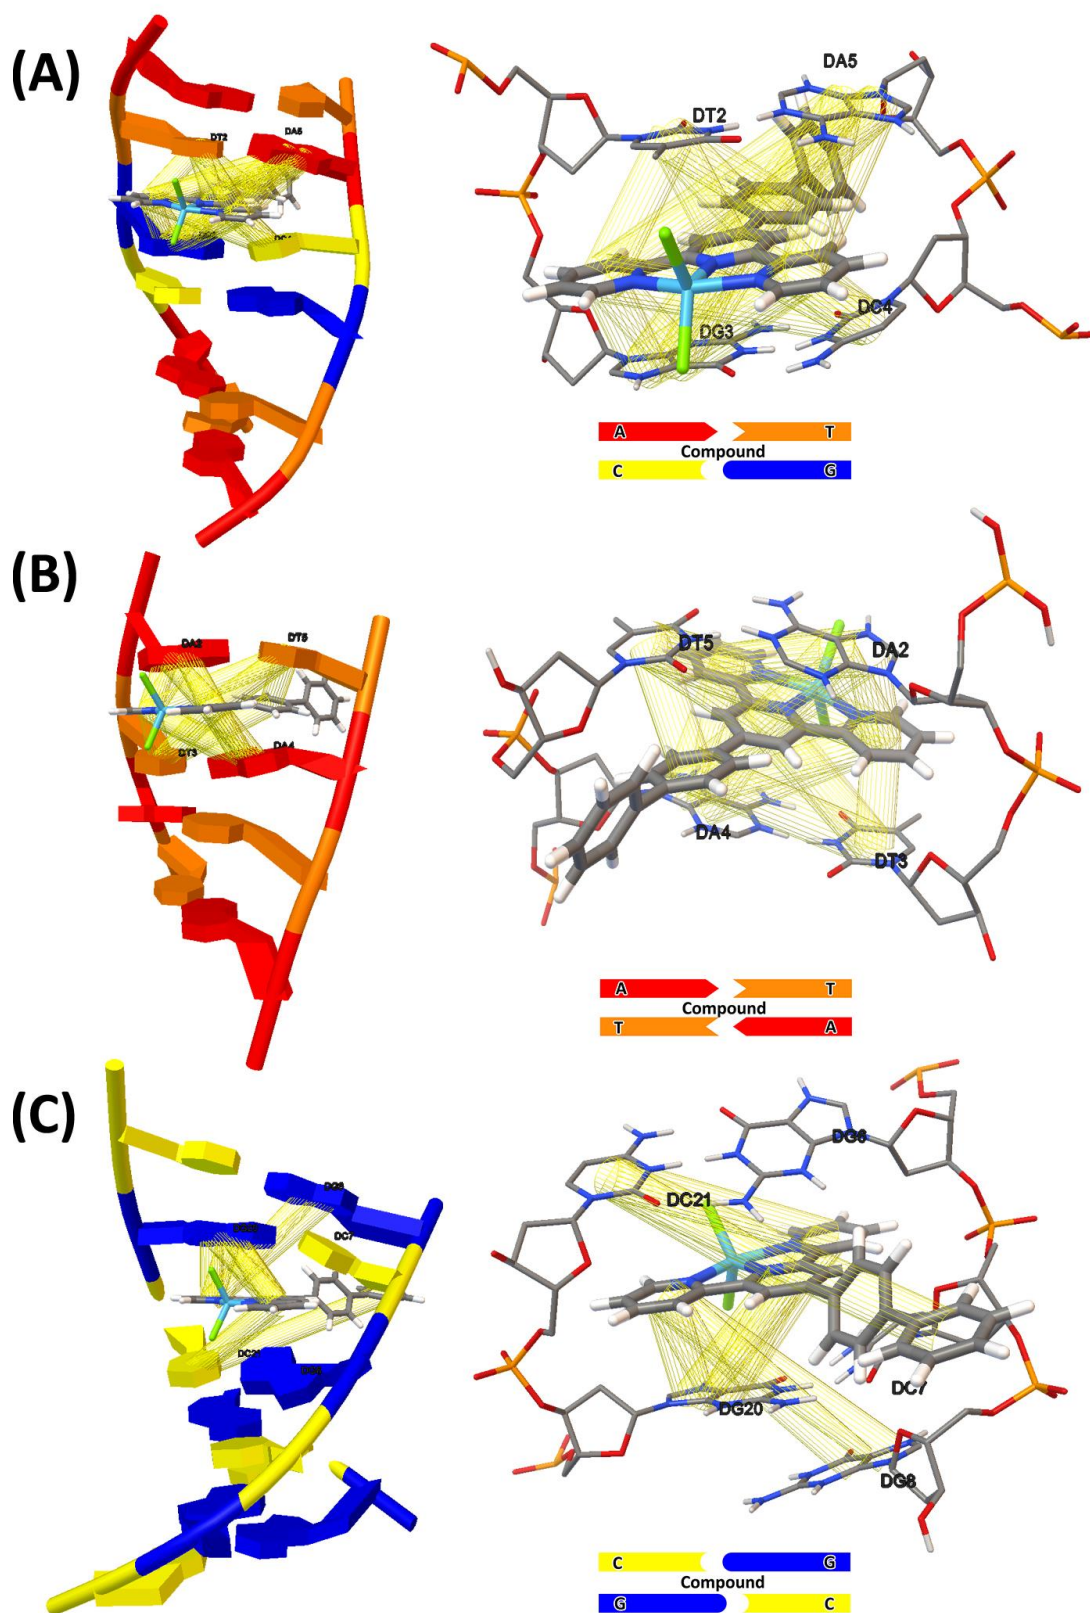

**Figure S49** View of the energy minimized docked poses of compound 4 with (A) ds(ATGCAT)<sub>2</sub> (PDB ID: 4JD8), (B) ds(ATAT)<sub>2</sub> (PDB ID: 2DA8M), and (C) ds(CGCGCG)<sub>2</sub> (PDB ID: 2ROUM).

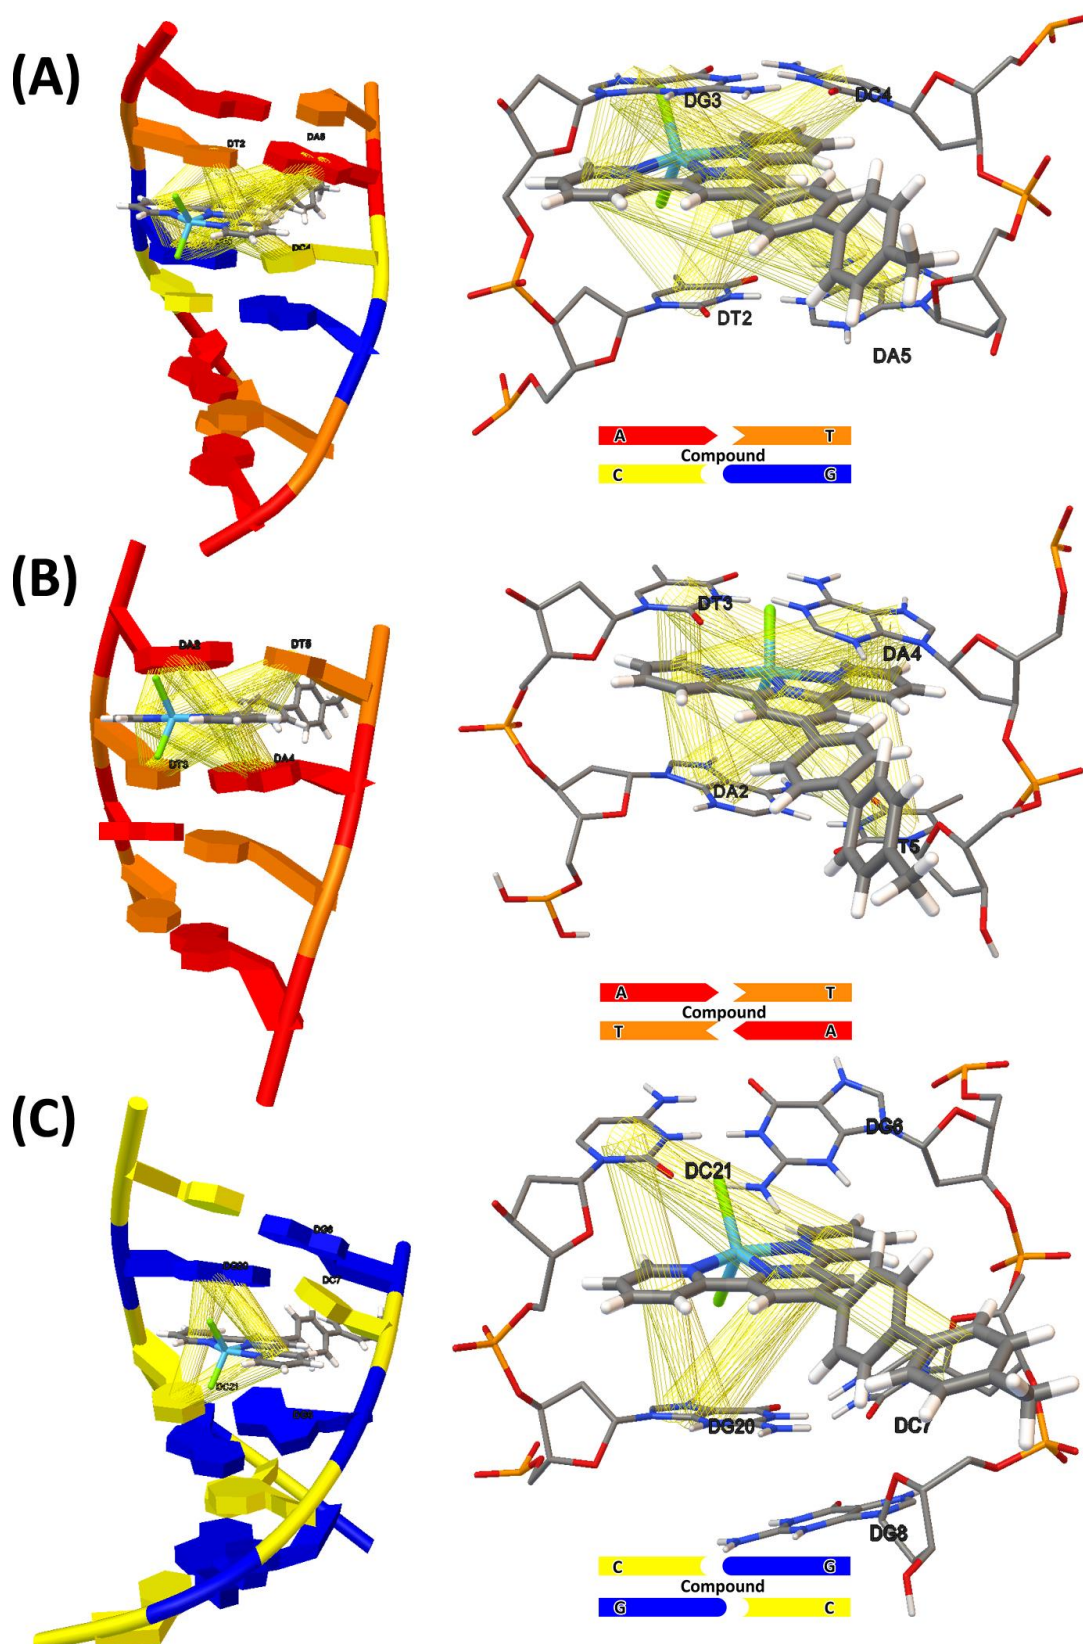

**Figure S50** View of the energy minimized docked poses of compound **5** with (A) ds(ATGCAT)<sub>2</sub> (PDB ID: 4JD8), (B) ds(ATAT)<sub>2</sub> (PDB ID: 2DA8M), and (C) ds(CGCGCG)<sub>2</sub> (PDB ID: 2ROUM).

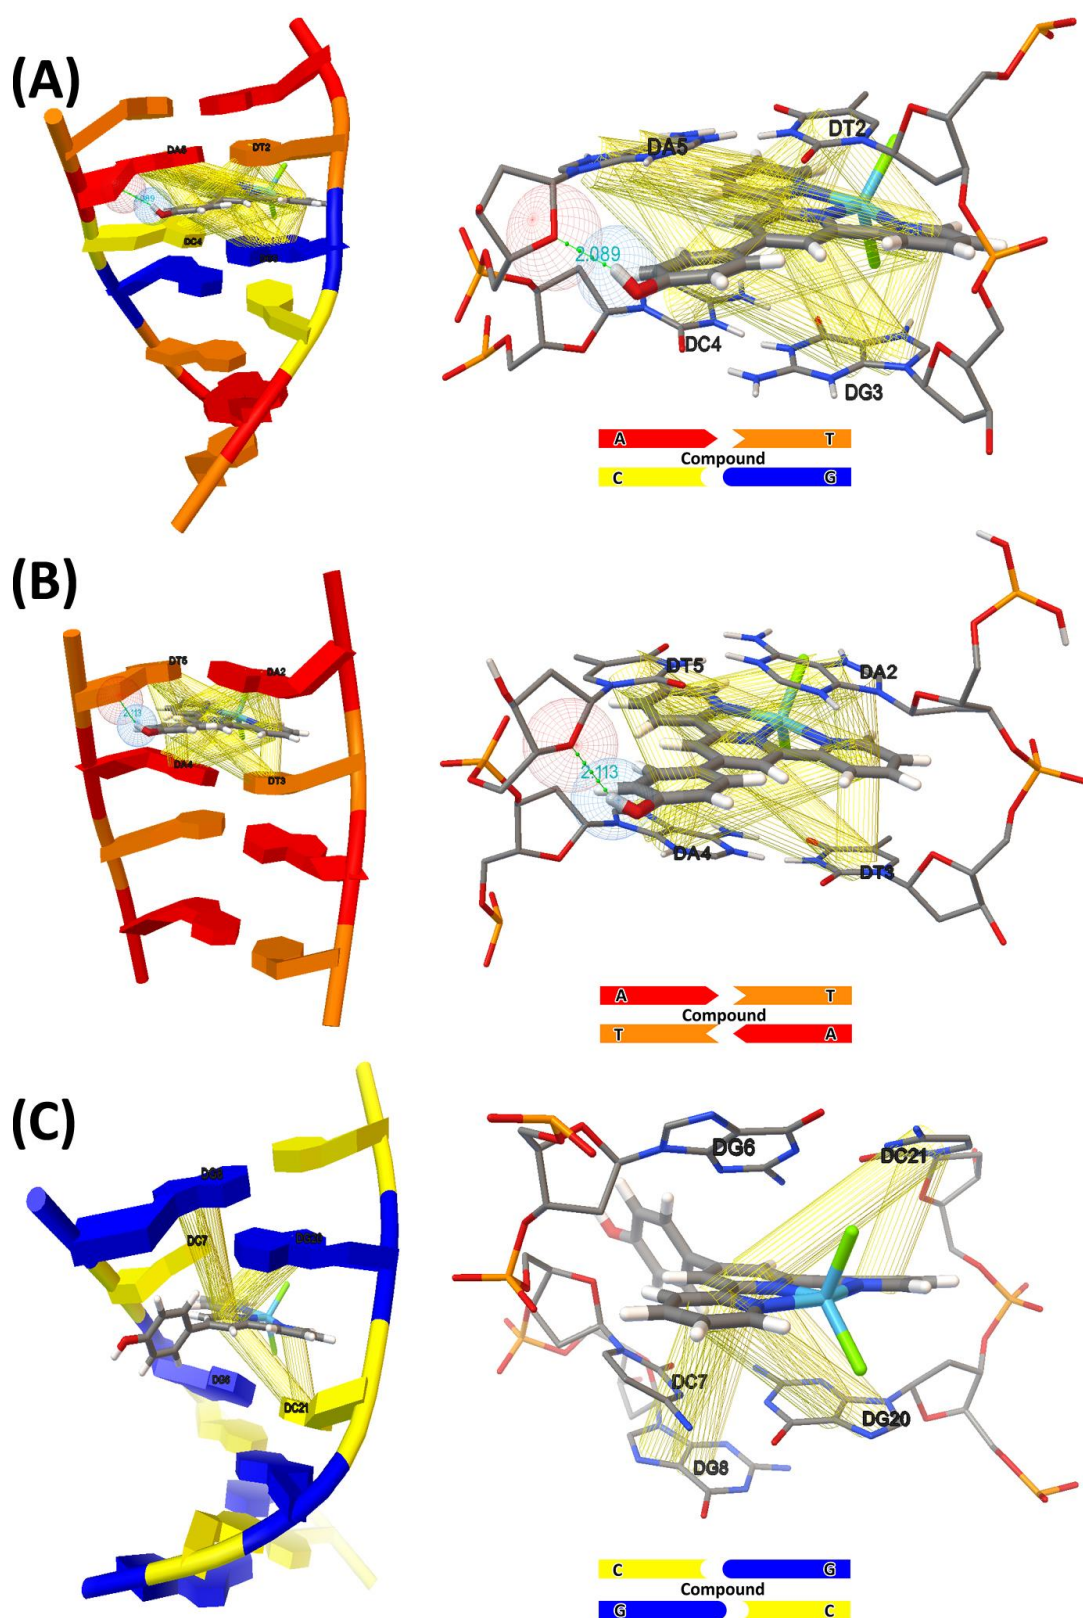

**Figure S51** View of the energy minimized docked poses of compound **6** with (A) ds(ATGCAT)<sub>2</sub> (PDB ID: 4JD8), (B) ds(ATAT)<sub>2</sub> (PDB ID: 2DA8M), and (C) ds(CGCGCG)<sub>2</sub> (PDB ID: 2ROUM).



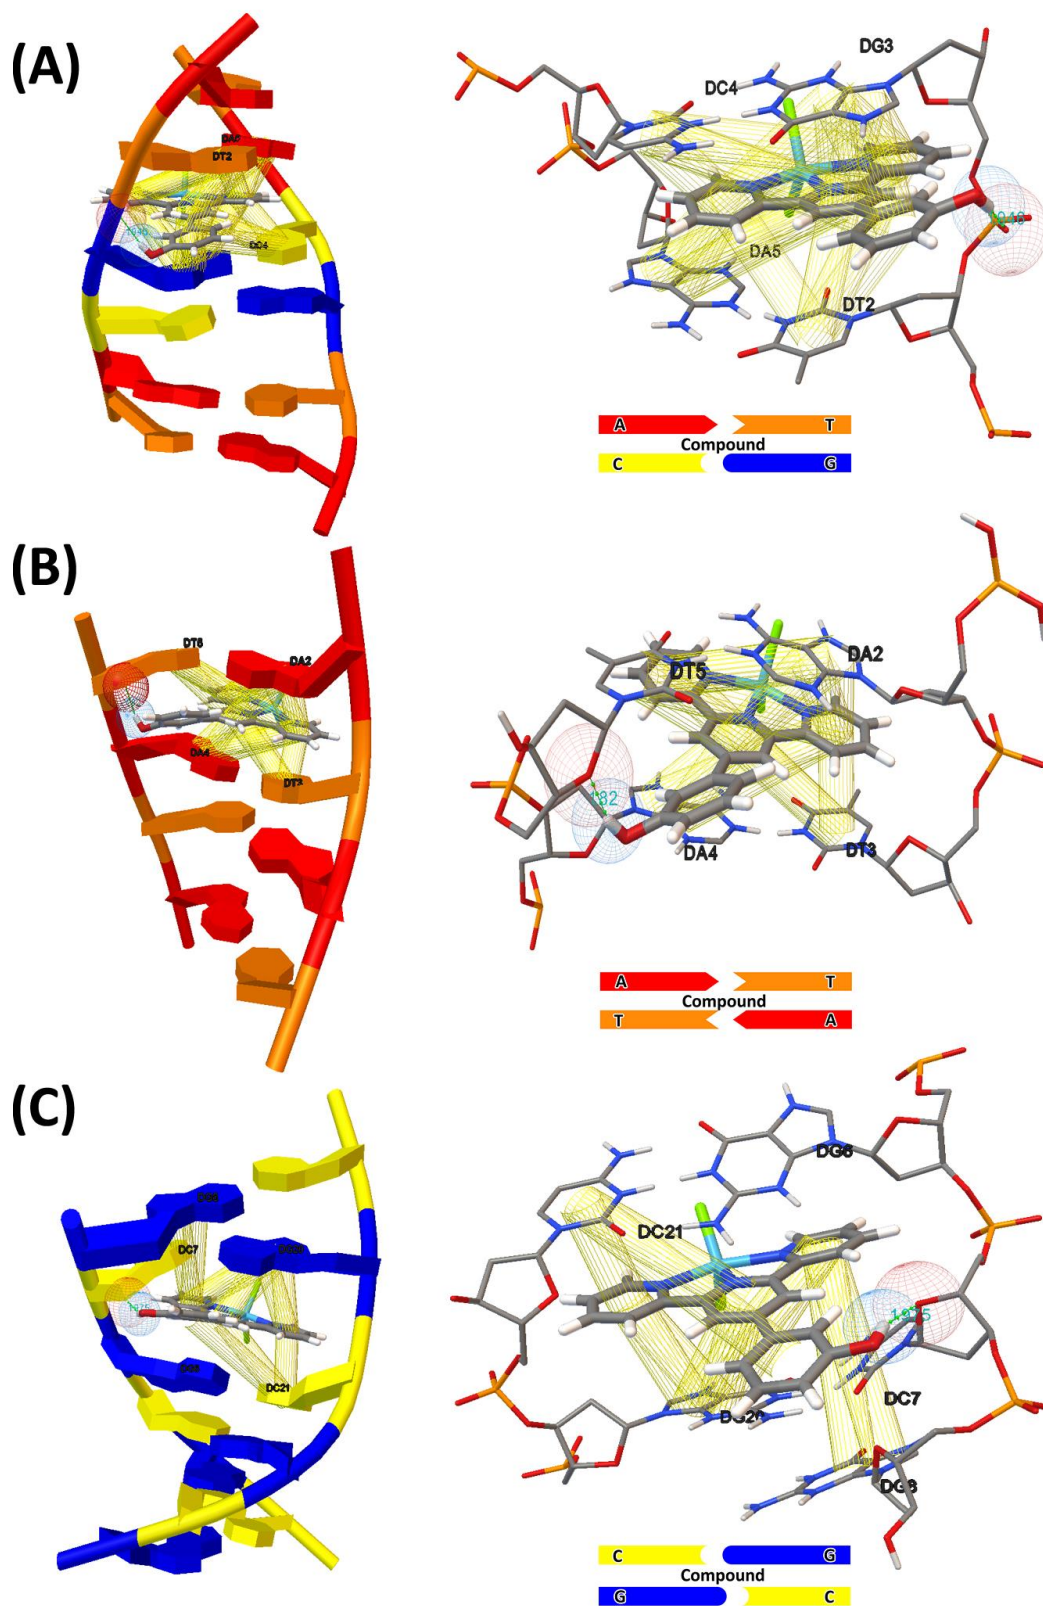

**Figure S52** View of the energy minimized docked poses of compound **7** with (A) ds(ATGCAT)<sub>2</sub> (PDB ID: 4JD8), (B) ds(ATAT)<sub>2</sub> (PDB ID: 2DA8M), and (C) ds(CGCGCG)<sub>2</sub> (PDB ID: 2ROUM).

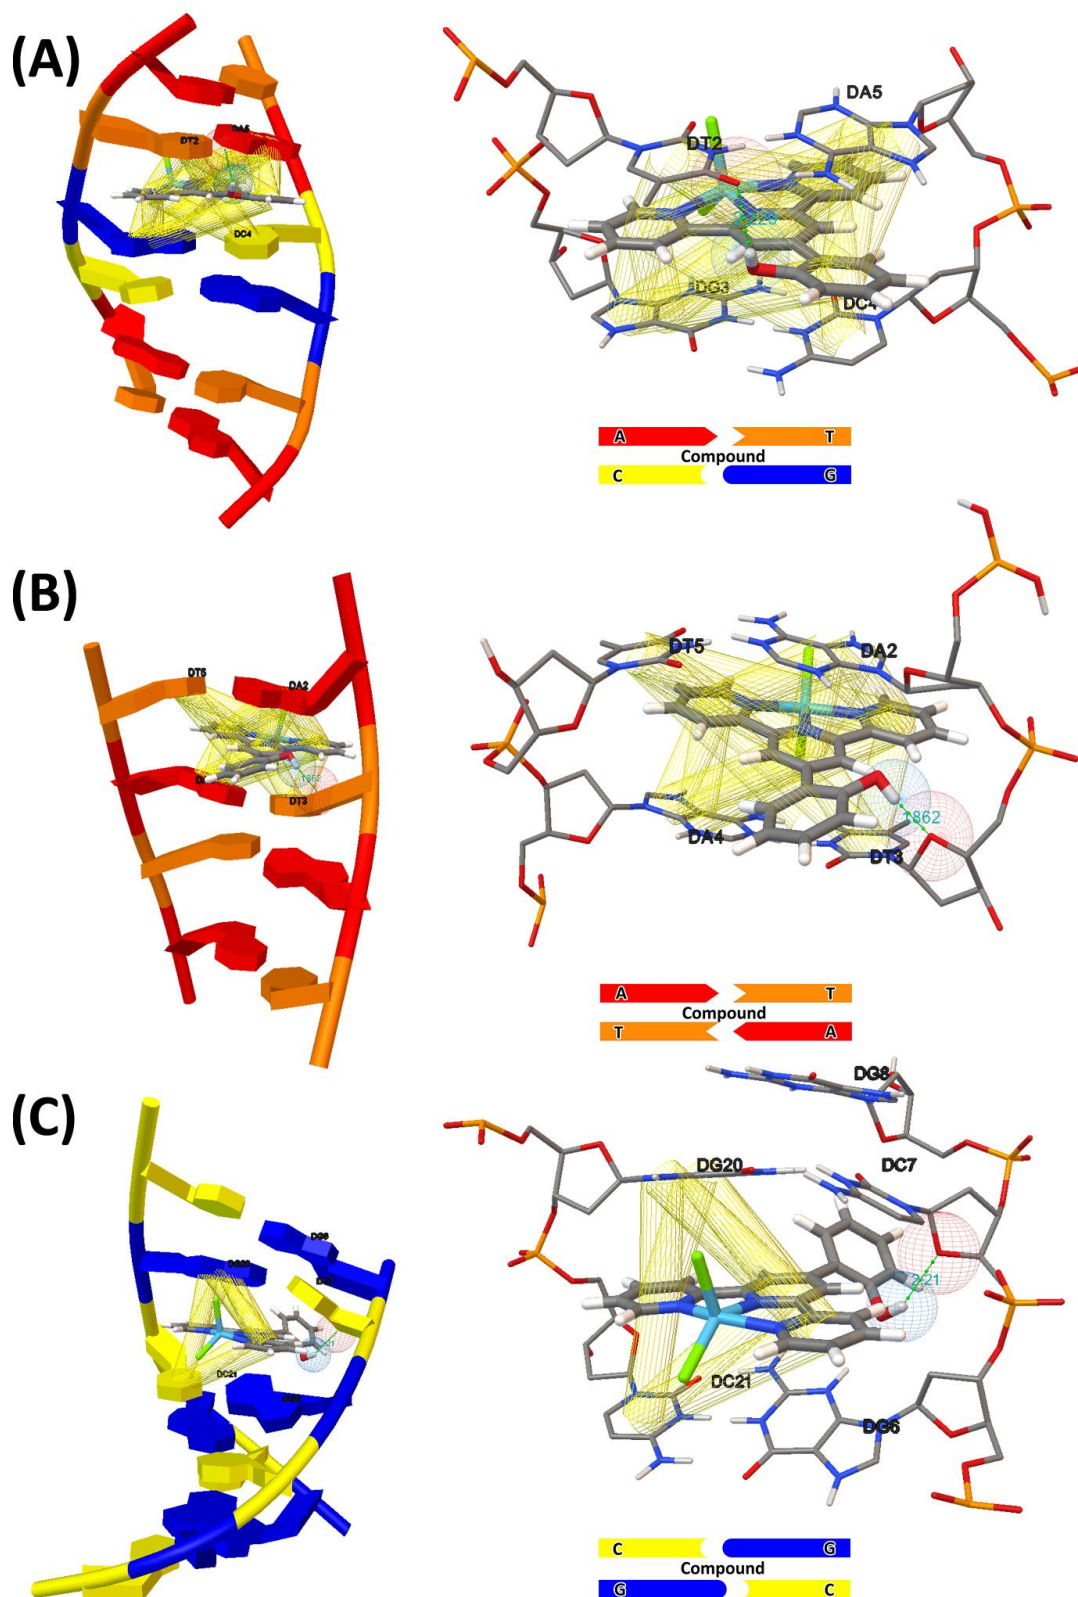

**Figure S53** View of the energy minimized docked poses of compound **8** with (A) ds(ATGCAT)<sub>2</sub> (PDB ID: 4JD8), (B) ds(ATAT)<sub>2</sub> (PDB ID: 2DA8M), and (C) ds(CGCGCG)<sub>2</sub> (PDB ID: 2ROUM).

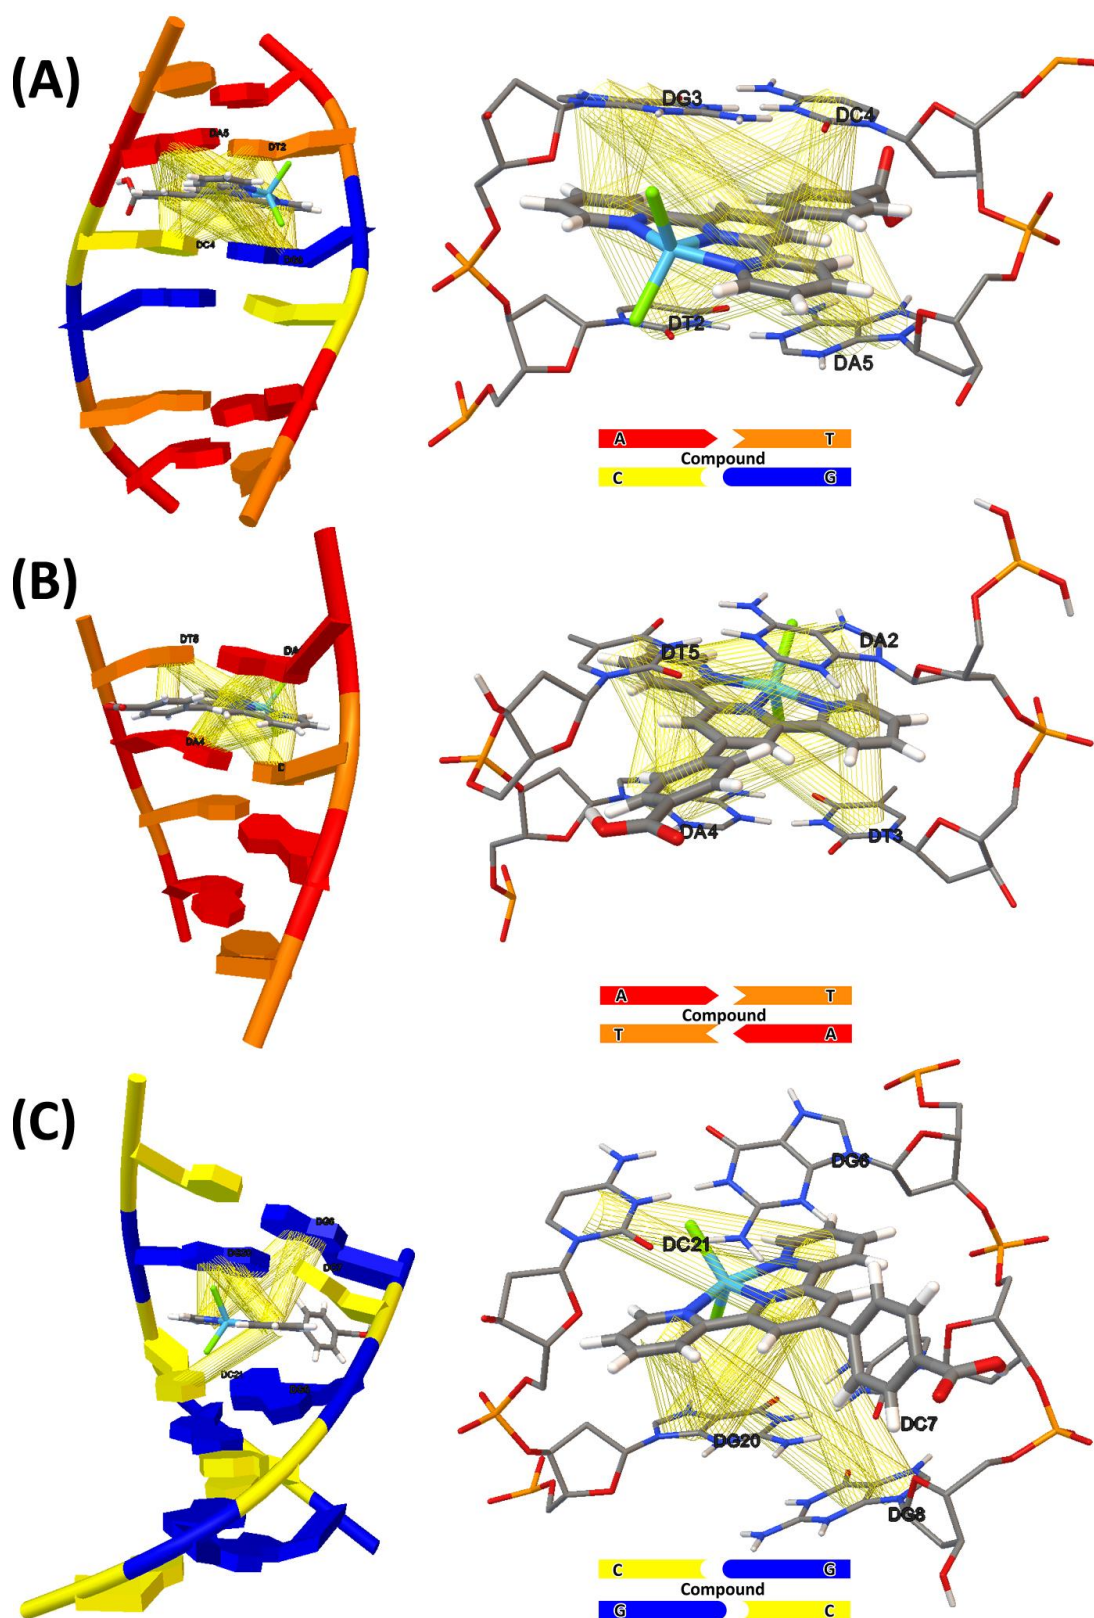

**Figure S54** View of the energy minimized docked poses of compound **9** with (A) ds(ATGCAT)<sub>2</sub> (PDB ID: 4JD8), (B) ds(ATAT)<sub>2</sub> (PDB ID: 2DA8M), and (C) ds(CGCGCG)<sub>2</sub> (PDB ID: 2ROUM).
